1 ***Mcidas* mutant mice reveal a two-step process for the specification and**  
2 **differentiation of multiciliated cells in mammals**

3  
4 **Hao Lu<sup>1</sup>, Priyanka Anujan<sup>1,2</sup>, Feng Zhou<sup>1,5</sup>, Yiliu Zhang<sup>1</sup>, Yan Ling Chong<sup>1</sup>, Colin D.**  
5 **Bingle<sup>2</sup> and Sudipto Roy<sup>1,3,4,\*</sup>**

6  
7 <sup>1</sup>Institute of Molecular and Cell Biology, Proteos, 61 Biopolis Drive, Singapore 138673,  
8 Singapore

9 <sup>2</sup>Academic Unit of Respiratory Medicine, Department of Infection, Immunity and  
10 Cardiovascular Disease, University of Sheffield, Sheffield S10 2JF, UK

11 <sup>3</sup>Department of Pediatrics, Yong Loo Lin School of Medicine, National University of  
12 Singapore, 1E Kent Ridge Road, Singapore 119288

13 <sup>4</sup>Department of Biological Sciences, National University of Singapore, 14 Science Drive  
14 4, Singapore 117543, Singapore

15 <sup>5</sup>Present address: Global Academic Ventures, Suite 3, 531 Upper Cross Street, #03-11,  
16 Singapore 050531

17 \*Author for correspondence: [sudipto@imcb.a-star.edu.sg](mailto:sudipto@imcb.a-star.edu.sg)

18 **ABSTRACT**

19 **Motile cilia on multiciliated cells (MCCs) function in fluid clearance over epithelia.**  
20 **Studies with *Xenopus* embryos and patients with the congenital respiratory disorder**  
21 **reduced generation of multiple motile cilia, have implicated the nuclear protein**  
22 **MCIDAS (MCI), in the transcriptional regulation of MCC specification and**  
23 **differentiation. Recently, a paralogous protein, GMNC, was also shown to be**  
24 **required for MCC formation. Surprisingly, and in contrast to the presently held view,**  
25 **we find that *Mci* mutant mice can specify MCC precursors. However, these**  
26 **precursors cannot produce multiple basal bodies, and mature into single ciliated**  
27 **cells. We show that MCI is required specifically to induce deuterosome pathway**  
28 **components for the production of multiple basal bodies. Moreover, GMNC and MCI**  
29 **associate differentially with the cell-cycle regulators E2F4 and E2F5, which enables**  
30 **them to activate distinct sets of target genes (ciliary transcription factor genes versus**  
31 **genes for basal body generation). Our data establish a previously unrecognized two-**  
32 **step model for MCC development: GMNC functions in the initial step for MCC**  
33 **precursor specification. GMNC induces *Mci* expression, which then drives the**  
34 **second step of basal body production for multiciliation.**

35

36 **RUNNING TITLE:** MCIDAS function in mouse MCCs

37 **KEY WORDS:** cilia, multiciliated cell, GMNC, MCIDAS, E2F, deuterosome

38 **SUMMARY STATEMENT:** We show how two GEMININ family proteins function in

39 mammalian multiciliated cell development: GMNC regulates precursor specification

40 and MCIDAS induces multiple basal body formation for multiciliation.

41

## 42 INTRODUCTION

43 Health of our airways is critically dependent on mucociliary clearance, a process by  
44 which pathogen- and pollutant-laden mucus is cleared out by the beating of hundreds  
45 of motile cilia that decorate the surfaces of MCCs (Bustamante-Marin and Ostrowski,  
46 2017). Ineffective mucus clearance predisposes individuals to respiratory diseases, best  
47 exemplified by congenital disorders like primary ciliary dyskinesia (PCD) and reduced  
48 generation of multiple motile cilia (RGMC) (Knowles et al., 2016). In PCD, MCCs form  
49 normally, but their cilia are immotile or have defective motility due to mutations in  
50 proteins of the motility apparatus. By contrast, in RGMC, differentiation of multiple  
51 cilia or the MCCs themselves is affected. MCCs are also present within brain ventricles,  
52 where they drive circulation of cerebrospinal fluid as well as within reproductive  
53 organs, where they promote mixing of reproductive fluids and germ cell transportation  
54 (Zhou and Roy, 2015, Brooks and Wallingford, 2014).

55 Post-mitotic MCC precursors support an explosive production of numerous  
56 basal bodies that migrate to the apical surface and nucleate the biogenesis of multiple  
57 motile cilia. One key aspect of MCC development is the transcriptional program  
58 required to institute its fate and its unique differentiation program, which has just  
59 begun to be elucidated (Spassky and Meunier, 2017). Studies with *Xenopus* embryos,  
60 which differentiate epidermal MCCs for mucus clearance, have implicated a small  
61 coiled-coil Geminin family protein, Mcidas (Mci; aka Multicilin), as a key regulator of

62 MCC fate (Stubbs et al., 2012). Morpholino-mediated inhibition of *Mci* function in the  
63 frog resulted in a complete loss of the MCCs, indicating an essential role of the protein  
64 for their specification and differentiation. This phenotype is largely conserved in RGMC  
65 patients carrying mutations in *MCIDAS*, encoding human MCI, with their airways  
66 populated by cells differentiating only one or two immotile cilia (Boon et al., 2014).  
67 Current evidence suggests that on the one hand MCI regulates transcription of genes  
68 encoding transcription factors (such as FOXJ1) that activate genes for ciliary  
69 differentiation and motility, and on the other genes for the production of multiple basal  
70 bodies (such as *Ccno*, *Deup1*, *Cep152* and *Ccdc78*) (Ma et al., 2014). MCI lacks a DNA  
71 binding domain, and is thought to regulate transcription by associating with the cell-  
72 cycle regulators E2F4 or E2F5, and their obligatory dimerization partner DP1 (Ma et al.,  
73 2014).

74         Recently, another MCI-related protein, GMNC (aka GEMC1), has been identified  
75 as an essential regulator of MCC development (Zhou et al., 2015, Terré et al., 2016, Arbi  
76 et al., 2016). Zebrafish and mice with mutations in *Gmnc* completely lack MCCs.  
77 Although there is disagreement on whether GMNC functions with the E2F proteins  
78 (Zhou et al., 2015, Terré et al., 2016), nevertheless, like MCI, it can fully activate the  
79 transcriptional program for MCC specification and differentiation. Both *Mci* and *Gmnc*  
80 are expressed quite specifically in developing MCCs: GMNC acts upstream of MCI and  
81 it is required for *Mci* expression in MCC precursors, whereas MCI is unable to induce

82 *Gmnc* (Arbi et al., 2016, Terré et al., 2016, Zhou et al., 2015). What remains presently  
83 unclear is how two related proteins, with purported similar transcriptional activities,  
84 can have near identical effects on the MCC developmental program. Given this  
85 quandary, we re-investigated *Mci* function, this time by stably inactivating the gene in  
86 mice. We now show that in contrast to the presently held belief that MCI regulates MCC  
87 specification as well as differentiation, *Mci* mutant mice can specify MCC precursors in  
88 normal numbers, which express a suite of genes for the transcriptional regulation of  
89 ciliary differentiation. However, these cells are unable to activate genes for basal body  
90 production, and consequently, differentiate single motile-like cilia. Moreover, we show  
91 that while MCI interacts with E2F4 and E2F5, GMNC forms a complex preferentially  
92 with E2F5, with distinct C-terminal domains of the two proteins determining this  
93 differential interaction. We argue that MCC precursor specification and induction of  
94 transcription factors for ciliary gene expression is regulated by GMNC. In the next step,  
95 MCI amplifies the expression of ciliary transcription factors and triggers the expression  
96 of genes required for biogenesis of multiple basal bodies. These basal bodies then seed  
97 the assembly of multiple cilia to complete the process of MCC differentiation. Thus, our  
98 study provides mechanistic insight into how the regulatory activities of two paralogous  
99 proteins coordinately organize the transcriptional program of a specialized ciliated cell-  
100 type.

## 102 RESULTS

### 103 *Mci* mutant mice cannot differentiate MCCs with multiple cilia

104 We used the CRISPR/Cas9 technology to generate a mutant allele of mouse *Mci*. This  
105 allele, a deletion of 32 bp in exon 2 of the *Mci* gene, is predicted to encode a severely C-  
106 terminally truncated MCI protein, lacking all of the important functional domains  
107 (coiled-coil domain in the middle of the protein and the TIRT domain for E2F/DP1  
108 interaction at the C-terminus (Ma et al., 2014)), implying a strong loss-of-function  
109 condition (see methods and Fig. S1A-D). Heterozygous mice exhibited no phenotypic  
110 abnormalities, and when intercrossed, homozygous wild-type, heterozygous as well as  
111 homozygous mutants were recovered in the correct Mendelian ratio. However, the  
112 homozygous mutants were runted compared to their wild-type and heterozygous  
113 siblings, and showed progressive post-natal lethality (Fig. S2A-C). Since *Gmnc* mutant  
114 mice also exhibit similar phenotypes, and their lethality was attributed to the  
115 development of hydrocephalus (Terré et al., 2016), we examined the *Mci* mutants for  
116 this defect. Indeed, histological analysis of the brains of two mutant animals (n = 2)  
117 showed hydrocephalus, suggestive of dysfunctional ependymal MCCs (data not shown,  
118 but see Fig. S2D,E). Moreover, all homozygous mutants tested (males and females)  
119 failed to breed, when in-crossed as well as when out-crossed, indicating MCC defects in  
120 the reproductive organs. To adduce evidence that the production of the wild-type MCI

121 protein is indeed disrupted in the homozygotes, we cloned the mutant *Mci* cDNA from  
122 tracheal tissue and confirmed the presence of the 32 bp deletion (Fig. S1E). Moreover,  
123 quantitation of *Mci* transcript levels from cultures of airway cells from the homozygotes  
124 revealed severe reduction relative to wild-type (see Fig. 4 below).

125 We next investigated the status of MCCs in tissues where they are normally  
126 known to differentiate – trachea, oviducts and brain ependyma (Brooks and  
127 Wallingford, 2014, Spassky and Meunier, 2017, Zhou and Roy, 2015). In the wild-type,  
128 abundant MCCs with multiple motile cilia were visible decorating the luminal surface  
129 of these tissues, interspersed with other cell-types (Fig. 1A,B and data not shown). By  
130 contrast, in the mutants we found a complete loss of the multiple ciliated cells (Fig.  
131 1C,D and data not shown). Instead, we could observe cells with a single cilium. The  
132 length and width of these monocilia were similar to the multiple cilia of MCCs, but  
133 distinctly different from the shorter, thinner primary cilia present on neighboring cells  
134 (Fig. 1C). Even though the *Mci* mutants develop hydrocephalus and are infertile,  
135 because these mice are maintained under specific-pathogen-free (SPF) conditions, we  
136 did not detect any obvious symptoms of airway disease either at the behavioral level or  
137 through histological analysis of respiratory tissues (data not shown).

138



139 **In *Mci* mutants, MCC precursors are specified but fail to generate multiple basal**  
140 **bodies**

141 To begin to uncover the developmental defect underlying MCC absence in *Mci* mutants,  
142 we first analyzed the expression of FOXJ1, a protein that is required to activate the  
143 motile cilia-specific transcriptional program (Yu et al., 2008, Stubbs et al., 2008, Choksi  
144 et al., 2014a). Previous studies with *Xenopus* embryos and human airway cells have  
145 shown that *Foxj1* is a transcriptional target of MCI (Boon et al., 2014, Stubbs et al., 2012).  
146 Strikingly, and contrary to these earlier findings, FOXJ1 expression was not affected in  
147 MCC harboring tissues of *Mci* mutant mice. While FOXJ1 was present in the nucleus of  
148 wild-type MCCs, in the mutants, we found nuclear-localized FOXJ1 in cells bearing  
149 single long cilium (Fig. 1E,F and Fig. S2D,E). Based on this observation, we reasoned  
150 that the absence of MCI function perhaps does not compromise the specification of  
151 MCC precursors, but instead is required in these cells to differentiate multiple cilia. To  
152 bolster this view, we analyzed the expression of a suite of additional transcription  
153 factors, which, like FOXJ1, have been implicated in motile ciliogenesis: RFX2, RFX3 and  
154 TAP73 (Choksi et al., 2014b, Jackson and Attardi, 2016). Again, like FOXJ1, expression  
155 of these transcription factors was not appreciably affected (Fig. 2A-F). These findings  
156 suggest that in the absence of MCI function, MCC precursors get specified normally,  
157 but they then differentiate a single cilium instead of multiple cilia. To garner evidence  
158 that this single cilium possesses attributes of motile cilia, we stained tracheal sections

159 with antibodies against RSPH1 and RSPH9, two radial spoke-head proteins that are  
160 unique structural components of motile cilia (Frommer et al., 2015). The single cilium of  
161 *Mci* mutants showed localization of both these proteins along the axoneme (Fig. 2G-J  
162 and Fig. S3A-D). We also examined the status of the MCCs in the trachea using  
163 scanning electron microscopy (SEM). Unlike in the wild-type, where hundreds of motile  
164 cilia were present at the apical surface of the MCCs, *Mci* mutant trachea showed cells  
165 with a single cilium whose dimensions were similar to the individual motile cilium of  
166 the wild-type MCCs (Fig. 2K,L).

167         Since MCC differentiation is contingent upon the generation of multiple basal  
168 bodies, we next investigated the status of these organelles. Staining with anti-  
169 PERICENTRIN antibodies revealed multiple basal bodies in wild-type MCCs, neatly  
170 arrayed along their apical membranes (Fig. 3A). By contrast, in *Mci* mutants, we could  
171 observe a single basal body associated with the single cilium (Fig. 3B). We obtained  
172 similar data with antibodies to  $\gamma$ -tubulin, which also labels ciliary basal bodies (data not  
173 shown; but see next section). Thus, the program for multiple basal body generation is  
174 significantly derailed in *Mci* mutants. We used transmission electron microscopy (TEM)  
175 to analyze the basal body phenotype in greater subcellular detail. While cilia-bearing  
176 multiple basal bodies were readily visible in wild-type MCCs, in the mutants, they were  
177 absent from several sections that we examined (Fig. 3C,D).

178

179 ***In vitro* culture of *Mci* mutant airway cells revealed a strong impairment in**  
180 **expression of basal body generation genes**

181 To uncover the earliest developmental defects in *Mci* mutant MCCs, we resorted to  
182 culture of mouse tracheal epithelial cells (mTECs) *in vitro*, followed by differentiation  
183 under air-liquid interface (ALI) condition. Consistent with our observations from  
184 tracheal sections, mTECs from *Mci* mutant mice differentiated single cilium bearing  
185 cells, unlike the wild-type where MCCs readily formed (Fig. 3E,F). Moreover,  
186 expression of FOXJ1 was not affected in *Mci* mutant cultures (Fig. 3G,H), implying that  
187 like *in vivo*, loss of MCI does not compromise the ability to adopt the MCC precursor  
188 identity (RSPH proteins also localized to the single cilium of ALI cultured cells (data not  
189 shown)). Moreover,  $\gamma$ -tubulin staining revealed absence of multiple basal bodies,  
190 whereas wild-type MCCs showed clouds of basal bodies at their apical surface (Fig. 3I-  
191 L). We obtained a similar result with antibodies against the CENTRIN protein that also  
192 marks the basal bodies (Fig. S3E-H). Thus, *in vivo* as well as *in vitro*, loss of MCI  
193 specifically compromises the ability of MCC precursors to generate multiple basal  
194 bodies.

195 We next used RT-qPCR analysis to interrogate the transcriptional profile of the  
196 *Mci* mutant cells. While *Mci* transcripts were strongly reduced, expression of genes

197 encoding upstream transcription regulatory factors such as GMNC, FOXJ1 and the RFX  
198 family members RFX2 and RFX3, were not appreciably affected or were slightly  
199 reduced relative to wild-type (Fig. 4A-E). This lack of a major reduction is consistent  
200 with our observations using immunofluorescence analysis, described above. By  
201 contrast, genes implicated in the production of multiple basal bodies – *Deup1*, *Ccdc78*,  
202 *Ccno* and *Cdc20b* - were all strongly reduced, indicating that MCI is specifically required  
203 to activate their transcription (Fig. 4F-I).

204

205 **In *Mci* mutant MCC precursors, deuterosomes are severely reduced in numbers and**  
206 **are dysfunctional**

207 Current view posits two distinct pathways for multiple basal body generation in MCCs.  
208 Some of the basal bodies are believed to be generated by the mother centriole-  
209 dependent (MCD) pathway, through the activity of proteins like CEP63, CEP152, PLK4  
210 and SAS6, which also function in centriole duplication during regular cell division (Al  
211 Jord et al., 2014, Spassky and Meunier, 2017). In addition to this, a dedicated pathway  
212 exists in the MCCs for basal body generation. The vast majority of basal bodies are  
213 produced by this alternative mechanism – the deuterosome-dependent (DD) pathway –  
214 in which DEUP1, CCNO, CCDC78 and CDC20B are believed to be dedicated  
215 components (Spassky and Meunier, 2017, Klos Dehring et al., 2013, Zhao et al., 2013,

216 Funk et al., 2015, Revinski et al., 2017). Here, electron dense structures called  
217 deuterosomes are first generated by the oligomerization of the CEP63 paralog, DEUP1.  
218 Although, whether the deuterosomes are nucleated by existing centrioles or arise *de*  
219 *novo* is presently a matter of debate (Al Jord et al., 2014, Zhao et al., 2018), what is clear  
220 is that after formation, they recruit CEP152 and other MCD pathway proteins (PLK4,  
221 SAS6 etc) to generate multiple procentrioles. These procentrioles then mature into  
222 centrioles, detach and migrate apically to dock with the plasma membrane and form  
223 ciliary basal bodies.

224 We found that despite the strong reduction in *Deup1* mRNA levels in *Mci*  
225 mutants, DEUP1-positive deuterosomes nevertheless formed, albeit in severely reduced  
226 numbers (Fig. 5A-E). However, since we consistently failed to detect multiple centrioles  
227 in *Mci* mutant MCCs *in vitro* as well as *in vivo*, these must be defective deuterosomes  
228 incapable of supporting centriole biogenesis. The complete absence of centriole  
229 duplication in *Mci* mutants suggests that even the MCD pathway is defective. To  
230 investigate this issue further, we examined expression of the MCD pathway gene *Cep63*,  
231 as well as *Cep152*, *Plk4* and *Sas6* (which are shared by both DD and MCD pathways),  
232 but failed to detect major differences in their expression levels (Fig. 5F-I).

233

234 **GMNC and MCI have distinct effects on the MCC-specific transcriptional program**

235 In *Gmnc* mutant mice, the expression of the entire MCC-specific transcriptional  
236 program is significantly dampened (Terré et al., 2016). This includes (i) genes for ciliary  
237 transcription factors like *FOXJ1* and *MCI* as well as (ii) genes for DD (but not MCD)  
238 pathway proteins. On the other hand, our current analysis shows that *MCI* loss  
239 preferentially affects the DD pathway genes. To examine this differential effect, we first  
240 over-expressed the human homologs of *GMNC* and *MCI* individually in HEK293T  
241 cells, and monitored the expression of genes from the two sets mentioned above. Terré  
242 et al. have previously demonstrated that HEK293T cells can be used effectively to assess  
243 the transcriptional activities of *GMNC* and *MCI* (Terré et al., 2016). *GMNC* could  
244 induce *MCI*; however, over-expression of *MCI* could not induce *GMNC* (Fig. 6A,B),  
245 which is consistent with previous reports (Arbi et al., 2016, Terré et al., 2016).  
246 Interestingly, both *GMNC* and *MCI* were able to induce *FOXJ1* (Fig. 6C). With respect  
247 to DD pathway genes, *MCI* alone or *MCI* together with *GMNC* strongly up regulated  
248 *DEUP1*, *CCNO* and *CDC20B* (Fig. 6D-F), although there was no obvious additive effect  
249 from the co-expression. Whereas, *GMNC* alone could only weakly induce these genes  
250 (Fig. 6D-F). These data support the idea that *MCI* preferentially affects the expression of  
251 DD pathway genes (also see below).

252 Since *MCI*, and also *GMNC*, have been reported to interact with E2F4 and E2F5  
253 for transcription, we next checked the transcriptional abilities of *GMNC* and *MCI* when  
254 co-expressed with E2F4 or E2F5. The ability of *GMNC* to induce *MCI* and *FOXJ1* was

255 strongly increased with E2F5, but not with E2F4 (Fig. 6G,H). Likewise, a slight  
256 upregulation of DD pathway genes occurred when GMNC was over-expressed with  
257 E2F5, but not with E2F4 (Fig. 6I-K). By contrast, MCI with E2F4 or E2F5 had stronger  
258 transcriptional effect on *DEUP1*, *CCNO* and *CDC20B* than MCI alone (Fig. 6I-K). With  
259 regard to *FOXJ1*, MCI with E2F4 as well as E2F5 could induce higher levels of  
260 transcription than MCI alone, and MCI with E2F4 was more efficient than MCI with  
261 E2F5 (Fig. 6H). Thus, the transcriptional activity of GMNC appears to be much more  
262 effective with E2F5, whereas MCI regulates its target genes with either E2F4 or E2F5.

263

#### 264 **Differential interaction of E2F4 and E2F5 with MCI and GMNC**

265 We previously showed that human GMNC is unable to interact effectively with E2F4  
266 (Zhou et al., 2015). However, Terré et al. demonstrated that GMNC can interact with  
267 E2F4 as well as E2F5 (Terré et al., 2016). Moreover, E2F5 has been previously shown to  
268 significantly potentiate the transcriptional activity of GMNC (Arbi et al., 2016). Since  
269 our current analysis shows that GMNC and MCI act in a step-wise manner and regulate  
270 distinct sets of targets, we reevaluated their interactions with the E2F factors. Consistent  
271 with our earlier report, human as well as mouse GMNC interacted poorly, if at all, with  
272 human and mouse E2F4 and DP1, respectively (Fig. 7A,B). By contrast, we found robust  
273 interaction of human and mouse GMNC with human and mouse E2F5 and DP1,

274 respectively (Fig. 7A,B). On the other hand, as reported before (Ma et al., 2014), MCI  
275 proteins from both species interacted equally efficiently with E2F4 and E2F5 (Fig. 7A  
276 and Fig. S4A).

277         The E2F/DP1 interaction domain in GMNC and MCI is located at the C-terminal  
278 end (approximately 40 amino acids – the TIRT domain) (Ma et al., 2014, Terré et al.,  
279 2016). We replaced this domain in GMNC with the one from MCI (Fig. S4B), and then  
280 examined the interaction of the chimera (GM) with E2F4 and E2F5. Similar to MCI, but  
281 unlike wild-type GMNC, the GM chimera efficiently bound E2F4 as well as E2F5 (Fig.  
282 7B). Despite this, GM over-expression alone or in combination with the E2F factors  
283 failed to elicit a transcriptional response in HEK293T cells, indicating that association  
284 with E2F4 by itself is not sufficient to switch the transcriptional activity pattern of  
285 GMNC towards that of MCI (Fig. S4C,D).

286

287 **MCI can substitute for GMNC, but GMNC cannot substitute for MCI in MCC**  
288 **formation**

289 Lastly, we investigated whether GMNC and MCI can substitute for each other in MCC  
290 development. Since the function of GMNC in MCC formation is quite conserved  
291 between zebrafish and mice (Arbi et al., 2016, Terré et al., 2016, Zhou et al., 2015), we  
292 first over-expressed mouse MCI in *gmnc* mutant zebrafish embryos, which completely



293 lack MCCs from all MCC bearing tissues, and found very efficient rescue of MCCs  
294 within the pronephric (kidney) ducts, where these cells promote urine flow (Fig. 8A-C).  
295 For the converse experiment, we used lentivirus-mediated human GMNC over-  
296 expression in mTEC ALI cultures from *Mci* mutant and wild-type mice. While GMNC  
297 produced ectopic MCCs in the wild-type, it failed to rescue MCC development in *Mci*  
298 mutant cultures (Fig. 8D-G and Fig. S5A,B,D). Moreover, while GMNC over-expression  
299 in *Mci* mutant cells could induce *Mci*, *Foxj1* and *Rfx3*, DD pathway genes were not  
300 upregulated at all (Fig. S6A,B,D-F and data not shown). This observation suggests that  
301 the weak induction of DD pathway genes on over-expression of GMNC in HEK293T  
302 cells that we noted earlier (cf. Fig. 6D-F), must occur via GMNC-dependent induction of  
303 MCI. By contrast, human MCI over-expression generated significant numbers of MCCs  
304 in wild-type as well as *Mci* mutant cultures, denoting effective rescue, and also induced  
305 high levels of *Foxj1* and DD pathway genes (Fig. 8H,I and Figs. S5A,C,D and S6C-F).  
306 Both the human *GMNC* and *MCI* genes were clearly over-expressed in these  
307 experiments (Fig. S5E,F), so the inability of GMNC to rescue is unlikely to be due to  
308 inadequate over-expression. Moreover, *E2f4*, *E2f5* and *Dp1* levels were also not affected  
309 in *Mci* mutant cells, and therefore, cannot also account for the lack of rescue of MCC  
310 formation by GMNC (data not shown).

311

## 312 DISCUSSION

313 Using *Mci* mutant mice, we have established two distinct steps in the developmental  
314 pathway for MCC formation that had remained previously unrecognized and are  
315 genetically separable: first, GMNC acts to specify MCC precursors, whereas in the  
316 second step, MCI drives multiple basal body production and multiciliation. Thus, in the  
317 absence of GMNC function, the MCC-specific developmental program is blocked at the  
318 earliest step, and no MCC precursors are generated (Zhou et al., 2015, Terré et al., 2016,  
319 Arbi et al., 2016). By contrast, loss of MCI does not derail MCC precursor specification,  
320 but affects their subsequent differentiation into MCCs. Although we cannot rule out  
321 species-specific differences in MCI function, it is likely that the discrepancy between our  
322 findings and the currently held notion of MCI activity (required for MCC specification  
323 and differentiation) stems from the different strategies used to interrogate MCI in mice  
324 and frogs (genetic mutant in mice versus morpholino knock-down in frogs) as well as  
325 methods used to examine MCC status on MCI loss in mice and humans (*in vivo* and *in*  
326 *vitro* analysis of MCCs from multiple mouse ciliated tissues versus RGMC patient  
327 MCCs obtained using nasal brush biopsy) (Stubbs et al., 2012, Boon et al., 2014).

328 Analysis of various kinds of multiciliated epithelia from *Mci* mutant mice have  
329 revealed that in all instances, MCC precursors form and express several transcription  
330 factors necessary for ciliary differentiation and motility. Consistent with this, these

331 precursors differentiate into cells with a single motile-like cilium. However, we could  
332 not detect multiple basal bodies with several makers of these organelles as well as TEM  
333 analysis. Even though some deuterosomes do form, no mature basal bodies are  
334 ultimately generated. Indeed, expression of genes currently implicated in the DD  
335 pathway – *Deup1*, *Ccdc78*, *Ccno* and *Cdc20b* - is significantly reduced in the *Mci* mutants.  
336 Since some MCC basal bodies are thought to be produced via the MCD pathway (Al  
337 Jord et al., 2014), our observation that there is consistently only one basal body in *Mci*  
338 mutant MCCs suggests that this pathway is also strongly impaired. Yet, we did not  
339 detect major changes in the levels of several important MCD pathway genes. Lack of  
340 effect on the MCD pathway genes have also been reported previously for the *Gmnc*  
341 mutant mice (Terré et al., 2016). Moreover, since MCC precursors devoid of both  
342 mother and daughter centrioles can generate deuterosomes and multiple basal bodies  
343 (Zhao et al., 2018), these data and our findings can be taken to indicate that the MCD  
344 pathway may not function in MCCs at all, at least in the tracheal MCCs, which we have  
345 investigated in sufficient detail, and all of the basal bodies in these cells could arise  
346 exclusively via the DD pathway. Given all of the current ambiguity by which the  
347 deuterosomes and basal bodies arise in the MCCs (Al Jord et al., 2014, Zhao et al., 2018),  
348 the *Mci* mutant mice will be a valuable reagent for further investigations into the precise  
349 mechanisms involved in these processes.

350 Finally, we have provided biochemical evidence for the difference in the  
351 transcriptional activities of GMNC and MCI, which explains the distinct MCC  
352 phenotypes observed when they are individually mutated. We found that GMNC  
353 interacts much more efficiently with E2F5 than E2F4. In addition, replacement of the C-  
354 terminal portion of GMNC with that from MCI, conferred on the chimeric protein the  
355 ability to interact with E2F4. Furthermore, our data show that GMNC is more effective  
356 in inducing *FOXJ1* and *MCI*, whereas MCI is more effective in inducing genes involved  
357 in basal body generation. When they are over-expressed with E2F4 or E2F5, GMNC is  
358 able to induce its targets much more efficiently with E2F5, whereas MCI largely fares  
359 equally well with E2F4 and E2F5. These data suggest that GMNC, in association with  
360 E2F5, induces expression of *Mci* and *Foxj1* to generate MCC precursors, but does not  
361 activate genes for basal body production. MCI, being more promiscuous in its ability to  
362 interact with the E2F factors, then amplifies the expression of *Foxj1* (and genes for other  
363 ciliary transcription factors) for the massive upregulation of the motile cilia  
364 transcriptional program, but more importantly, induces genes for the production of  
365 multiple basal bodies. This molecular logic helps to clarify why GMNC cannot rescue  
366 MCC formation in *Mci* mutant ALI culture, but MCI is sufficient to restore MCC  
367 development in *gmnc* mutant zebrafish. Although the C-terminus is essential for  
368 conferring the differential interaction with E2F proteins, the N-terminal portion of  
369 GMNC appears to be equally important for its transcriptional ability. The chimeric GM

370 protein not only failed to mimic the transcriptional activation profile of MCI, but also  
371 showed an overall impairment in transcriptional activating activity. This implies that  
372 either the N-terminal is important for interacting with other transcriptional cofactors  
373 (since the coiled coil domain resides in this region) or it makes an important  
374 contribution to the formation of a functional E2F/DP1 ternary complex. As a corollary of  
375 this observation, we propose that the N-terminus of MCI could also have a similar role  
376 in determining its transcriptional activity. Since the precise mechanism by which the  
377 MCI/GMNC-E2F-DP1 complex regulates transcription is not understood, and it is also  
378 not clear whether other co-factors are involved (especially in the regulation of the  
379 distinct sets of target genes), further biochemical experiments will be required to resolve  
380 these questions.

381 In conclusion, our study of the *Mci* mutant mouse will be of direct relevance to  
382 the role of MCCs in ciliopathies, especially for the pathobiology of RGMC, a relatively  
383 new but acute airway disease that remains rather poorly defined. In addition, the ability  
384 of GMNC and MCI to generate ectopic MCCs provides a powerful avenue to devise  
385 strategies for restoration of functional ciliated epithelia by gene therapy. This holds  
386 promise not only for rare disorders like RGMC, but also in acquired and more prevalent  
387 airway pathologies such as chronic obstructive pulmonary disorder (COPD), where  
388 impairment of ciliary function has also been implicated (Yaghi and Dolovich, 2016).

389

390 **MATERIALS AND METHODS**

391 **Ethics approvals**

392 All mouse and zebrafish experimentation was performed under approval from the  
393 Singapore National Advisory Committee on Laboratory Animal Research and  
394 conformed to the stipulated ethical guidelines.

395

396 **Generation of *Mci* knockout mice**

397 *Mci* mutant mice were generated by CRISPR/Cas9 mediated deletion of a DNA  
398 fragment within exon 2 of the *Mci* gene. Two guide RNAs (gRNAs) were designed to  
399 target the exon 2, and were co-injected with Cas9 mRNA (25 ng/ $\mu$ l) into C57BL/6 one-  
400 cell embryos at a concentration of 15 ng/ $\mu$ l each (see Table EV1 for sequences of gRNAs  
401 and all primers used in this study). A total of 247 embryos were injected, out of which  
402 130 were implanted into 9 pseudo-pregnant females. Founder animals were screened by  
403 PCR, and mutations were determined first by T7 endonuclease I assay, and then by  
404 deep sequencing of PCR products (for selected founders). Out of 13 pups born alive, 9  
405 were found to contain mutations at the *Mci* targeted region. Founders containing the  
406 desired mutation were bred with the wild type C57BL/6J animals to produce F1  
407 heterozygotes. The F1 mutants were identified by PCR and confirmed by sequencing.

408 **Zebrafish strains**

409 The AB strain was used as the wild-type for all experiments. The *gmnc* mutant strain  
410 has been described previously (Zhou et al., 2015).

411

412 **DNA constructs**

413 Coding sequences for human and mouse DP1, E2F4, E2F5 were cloned into the pCS2  
414 vector with 6x Myc-tags at the N-terminus. Coding sequences for human and mouse  
415 GMNC and MCI were cloned into the pXJ40 vector with one HA tag at the N-terminus.  
416 The human GM chimera was generated using overlapping extension PCR, and cloned  
417 into pXJ40 vector with one HA tag at the N-terminus.

418

419 **Co-immunoprecipitation and immuno-blot**

420 Desired combinations of plasmids were co-transfected into HEK293T cells, in 10 cm  
421 dishes (3 µg per plasmid, per dish) using Lipofectamine 2000 (Thermo Fisher Scientific).  
422 After 24 hrs of incubation, transfected cells were lysed in 800 µl of RIPA buffer (Thermo  
423 Fisher Scientific) supplemented with complete Mini protease inhibitors, EDTA-free  
424 (Roche, #11836170001). The cell lysates were sonicated briefly and spun down. An  
425 aliquot was taken from the clear cell lysate and boiled in 1X SDS loading buffer as input

426 (TCL), and the rest was rotated over-night with 25  $\mu$ l of Protein A-agarose beads  
427 (Roche) and 2  $\mu$ g of mouse anti-HA antibody (monoclonal, Santa Cruz, SC7392). The  
428 beads were washed four times in the IP buffer and boiled in 50  $\mu$ l of 1X SDS loading  
429 buffer (IP:HA). Both TCL (15  $\mu$ l, 1 %) and IP (15  $\mu$ l, 30 %) were resolved by SDS-PAGE  
430 gels, transferred to PVDF membranes, blocked in 2 % BSA, and probed with relevant  
431 primary antibodies (rabbit anti-HA (Santa Cruz, SC805); rabbit-anti-Myc (Santa Cruz,  
432 SC289) and secondary antibodies (anti-mouse HRP conjugate (Promega, #W4028), anti-  
433 rabbit HRP conjugate (Promega, #W4018)).

434

#### 435 **Antibodies**

436 Primary antibodies: mouse-anti-HA (Santa Cruz SC7392, 1:2500 for western blot, 1:500  
437 for immunofluorescence (IF)); rabbit-anti-HA (Santa Cruz SC805, 1:2500 for western  
438 blot, 1:500 for IF); mouse-anti-Myc (Santa Cruz SC40, 1:2500 for western blot); rabbit-  
439 anti-Myc (Santa Cruz SC289, 1:2500 for western blot); mouse-anti-acetylated- $\alpha$ -tubulin  
440 (Sigma-Aldrich T 6793, 1:500 for IF); mouse-anti- $\alpha$ -tubulin (Sigma-Aldrich T6557, 1:500  
441 for IF); mouse-anti- $\gamma$ -tubulin (Sigma-Aldrich T6557, 1:500 for IF); rabbit-anti- $\gamma$ -tubulin  
442 (Sigma-Aldrich T5192, 1:500 for IF); mouse-anti- $\gamma$ -tubulin (Sigma-Aldrich T6557, 1:500  
443 for IF); rabbit-anti-RFX2 (Sigma-Aldrich HPA048969, 1:250 for IF), rabbit-anti-RFX3  
444 (Sigma-Aldrich HPA035689, 1:250 for IF); rabbit-anti-FOXJ1 (Sigma-Aldrich, HPA



445 005714, 1:250 for IF); mouse anti-FOXJ1 (ebiosciences 14-9965-80, 1:100 for IF); rabbit-  
446 anti-TAP73 (Abcam ab40658, 1:250 for IF); rabbit-anti-RSPH1( Sigma-Aldrich  
447 HPA017382, 1:250 for IF); rabbit-anti-RSPH9 ( Sigma-Aldrich HPA031703, 1:250 for IF);  
448 rabbit-anti-PERICENTRIN (Abcam ab4448, 1:250 for IF); mouse anti-CENTRIN (EMD  
449 Millipore Corp 04-1624, 1:200 for IF) and rabbit-anti-DEUP1 (kind gift of X. Zhu,  
450 Shanghai Institute of Biochemistry and Cell Biology, 1:200 for IF). Secondary antibodies  
451 (all used at 1:500 for IF): Alexa 488 goat-anti mouse (Invitrogen A-11029); Alexa 488 goat  
452 anti-rabbit (Invitrogen A-11034); Alexa 555 goat anti-rabbit (Invitrogen A-21428); Alexa  
453 555 goat anti-mouse (Invitrogen A-28180).

454

#### 455 **Cell and ALI culture**

456 HEK293T and HEK293FT cells were cultured in DMEM with 4500 mg/l glucose and 10  
457 % FBS (HyClone, SH30071.03HI). mTEC culture was performed according to published  
458 protocol (Vladar and Brody, 2013). Briefly mTEC cells were grown on transwells with  
459 transparent PET membrane (Life Science, 353095) in mTEC plus+RA medium  
460 (DMEM/F12; Life Science, 11330-032), Fungizone (Life Technologies, 15290-018, 0.1 %  
461 v/v), Insulin (Sigma-Aldrich, 11882, 10 mg/ml), Epidermal growth factor (BD  
462 Biosciences, 354001, 25 ng/ml), Transferrin (Sigma T1147, 5 mg/ml), Cholera toxin  
463 (Sigma-Aldrich C8052, 0.1 mg/ml), Fetal bovine Serum (Life Technologies 26140-079, 5%  
464 v/v), ROCK inhibitor (ATCCY27632 ,10  $\mu$ M), Retinoic acid (Sigma-Aldrich R2625, 50

465 nM) and Penicillin-Streptomycin (Life Technologies 15140-148, 100 U Pen, 100 mg Strep  
466 per ml). When cells on the apical side of the transwell chambers reached 100 %  
467 confluence, ALI was established by aspirating the culture medium from the transwell  
468 chambers, and addition of differentiation medium (mTEC Plus medium without fetal  
469 bovine serum and ROCK inhibitor) to the basal chamber on 24 well-plates. The mTEC  
470 cells were maintained on transwells by changing the differentiation medium in the  
471 basal chamber every 2 days.

472

### 473 **Immunofluorescence**

474 For IF analysis, mTEC cells grown on transwells were fixed in 4 % paraformaldehyde  
475 (PFA) at room temperature (RT) for 10 minutes and permeabilised with PBTX (PBS, 0.5  
476 % Triton X-100) for 2 hrs and washed in phosphate buffered saline (PBS). Cells were  
477 then blocked with 2 % bovine serum albumin in PBS for 1 hr, followed by 1 hr with  
478 primary antibody at RT. After 3 washes in PBS, cells were incubated with secondary  
479 antibodies and DAPI for 1 hr. After briefly washing with PBS, the cells were mounted  
480 on glass slides with fluorescence mounting medium and imaged using an Olympus  
481 FluoView upright laser scanning confocal microscope. Cryosections of mouse tissues  
482 were prepared by the histopathology unit and the slides stored at -80°C. On the day of  
483 staining, slides were thawed and dried before drawing borders around the sections  
484 with a PAP pen (Abcam ab2601). The slides were then fixed with 4% PFA for 15 min at

485 RT in Coplin jars (all subsequent steps performed in Coplin jars unless stated  
486 otherwise). They were rinsed twice with cold PBS followed by permeabilisation with 0.2  
487 % Triton (in PBS) for 15min. They were washed 3 times, 5 min each in PBS and blocked  
488 with 2 % BSA in PBS for 2 hrs at RT. The slides were then transferred to a humidified  
489 box. Primary antibodies in PBS (with 0.1 % Tween20 and 1 % BSA) were pipetted onto  
490 the sections and incubated over-night at 4°C. The following day, slides were washed  
491 with PBS on a shaker, 6 times, 10 min each, at RT. Secondary antibodies in PBS (with 0.1  
492 % Tween20 and 1 % BSA) were then added, and the slides incubated in the humidified  
493 box for 5 hrs at RT. Finally, the slides were washed 6 times (10 min each) with PBS at  
494 RT, dried, and mount with Vectashield.

495

#### 496 **RT-qPCR**

497 cDNA preparations were generated using the SuperScript III First-Strand Synthesis  
498 System (Invitrogen 18080051). Gene-specific primers for qPCR were designed using the  
499 Primer3 software (Primer3 (v.0.4.0)) and are listed in Table EV1. qPCRs were performed  
500 with the EXPRESS SYBR GreenER Super Mix (Invitrogen A10315) on an Applied  
501 BioSystems 7900HT Fast Real-Time PCR System using the SDS2.4 software. Technical  
502 triplicate reactions were performed for each sample. Using Microsoft Excel, gene  
503 expression fold differences were calculated from the Ct values after normalizing against  
504 the internal control *Gapdh*/*GAPDH*.

505

506 **Microinjection of zebrafish eggs and processing for IF analysis**

507 mRNA encoding mouse MCI (300 ng/ $\mu$ l, 0.75 nl per egg) was injected into one cell stage  
508 eggs derived from in-cross of *gmnc* heterozygous fishes. At 48 hours post fertilization  
509 (hpf), the injected embryos were fixed with Dent's fixative (80 % methanol, 20 % DMSO)  
510 for 3 hrs at RT and then subjected to IF staining using routine protocol.

511

512 **Lentivirus generation and infection**

513 Gene expression lentiviruses were generated using ViraPower™ Lentiviral Expression  
514 Systems Version C (Invitrogen 25-0501). Briefly, coding sequences of different genes  
515 were cloned into PLVX vector, followed by transfection into HEK293FT cells together  
516 with the Lentiviral Packaging Mix (Invitrogen, K4975-00). Viruses were harvested by  
517 collecting the cell culture medium 3 days after transfection. Viral titration was  
518 performed by infecting 293FT cells with the control GFP lentivirus which was generated  
519 together with gene-specific expression lentiviruses (*GMNC* and *MCI*), and then  
520 determined by the percentage of GFP positive cells 3 days after infection. For confluent  
521 mTEC cells viral infection, the cells were treated with 12 mM EGTA (Sigma-Aldrich,  
522 E3889) in 10 mM HEPES (Sigma-Aldrich H3375-25G), pH 7.4 for 25 min at 37°C. After  
523 washing the EGTA treated cells with PBS, a mix of specific amounts of lentivirus and

524 Polybrene (Sigma-Aldrich, H9268, 5 µg/ml final concentration) was added into the  
525 culture medium. mTEC cells with the viruses were then centrifuged at 1,500g for 80 min  
526 at 32°C, and grown at 37°C in a cell culture incubator.

527

### 528 **Electron microscopy of mouse trachea**

529 For SEM analysis: Immediately after dissection, mouse tracheae were fixed by  
530 immersion in 4 % formaldehyde and 2 % glutaraldehyde (EM grade, Electron  
531 Microscopy Sciences) in 0.1M Sodium cacodylate buffer (pH = 7.4) for 12 hrs. After  
532 washing, samples were cut across the length into approximately 2 mm pieces, and  
533 subsequently cut longitudinally to expose the interior surface. Trimmed samples were  
534 post-fixed with 1 % Osmium tetroxide in distilled water for 2 hrs, washed with distilled  
535 water and dehydrated in Ethanol series. Dehydrated samples were dried using critical  
536 point drying (Leica EM CPD030), mounted onto aluminium stubs with trachea lumen  
537 facing up and sputter coated with 4 nm layer of platinum (Leica EM SCD050). SEM  
538 analysis was performed using a JSM 6701F SEM (JEOL) microscope operating at 2.5kV.  
539 Images were collected from random areas of the wild-type and mutant samples. For  
540 TEM analysis: Dissected tracheae were fixed in 4 % paraformaldehyde, 2.5 %  
541 glutaraldehyde, and 0.2 % picric acid in 0.1 M Sodium cacodylate buffer. Samples were  
542 washed in Sodium cacodylate buffer and post fixed with 1 % Osmium tetroxide.

543 Samples were again washed in Sodium cacodylate buffer before dehydration through a  
544 graded series of Ethanol. After dehydration, samples were infiltrated and embedded  
545 with Spurr resin (Electron Microscopy Sciences 14300) before polymerization at 60°C.  
546 Ultra-thin sections were obtained by cutting sample blocks on an ultramicrotome (Leica  
547 ultracut UCT), stained with 4 % Uranyl acetate and 2 % Lead citrate before viewing the  
548 sections with a TEM (Jeol 1010) microscope.

549

#### 550 **Statistical analysis**

551 The statistical analysis, including standard error of the mean (SEM), standard deviation  
552 (SD), and unpaired *t*-test, was performed using the software GraphPad Prism 7.04.

553

554 **Acknowledgements**

555 We thank the Animal Gene Editing Laboratory, Biological Resource Centre, Agency for  
556 Science, Technology and Research for generating the *Mci* mutant mice, the Advanced  
557 Molecular Pathology Laboratory for histological services, the Institute of Medical  
558 Biology-Institute of Molecular and Cell Biology Joint Electron Microscopy Suite for  
559 electron microscopy analysis, V. Tergaonkar for assistance in obtaining appropriate  
560 clearance from the Institutional Animal Care and Use Committee (IACUC) for  
561 experiments with the *Mci* mutant mice, X. Zhu for DEUP1 antibodies and A. Guha and  
562 members of our laboratory for discussion and comments on the manuscript.

563

564 **Competing interests**

565 The authors declare no competing or financial interests.

566

567 **Author contributions**

568 S.R. conceived the project. L.H. performed majority of the experiments including  
569 analysis of mutants, ALI culture and transcriptional studies. P.A. established ALI  
570 culture and gene expression analysis. F.Z. contributed to mutant analysis. Y.L.Z.  
571 contributed data for protein interaction studies. Y.L.C. performed TEM analysis. S.R.

572 and C.D.B. supervised the work. All authors critically analyzed the data. L.H. and

573 Y.L.Z. assembled the figures. S.R. wrote the paper with input from all authors.

574

575 **Funding**

576 P.A. was supported by a University of Sheffield, UK-Agency for Science, Technology

577 and Research (A\*STAR), Singapore doctoral studentship. This work was supported by

578 funds from the A\*STAR to S.R.

579



580 FIGURES AND LEGENDS

Fig. 1

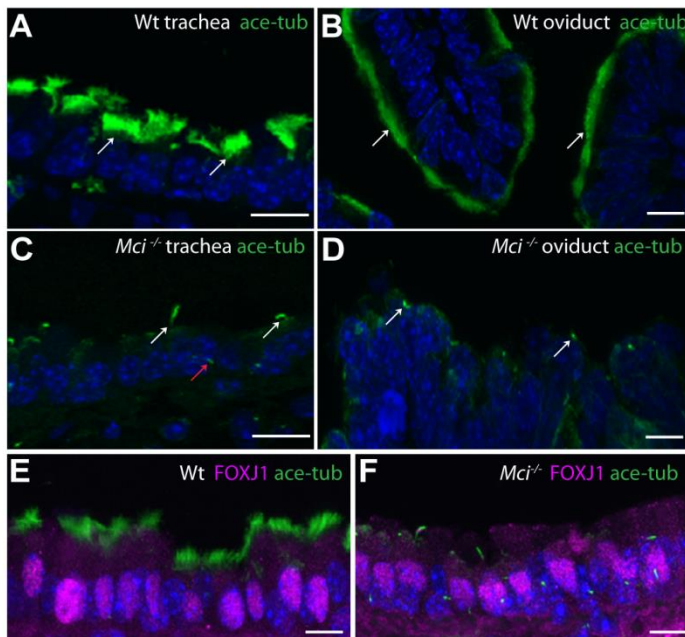

581

582 **Fig. 1. MCCs in *Mci* mutant mice differentiate a single cilium and express FOXJ1.** (A)

583 Wild-type trachea section showing multiple cilia on MCCs (arrows). (B) Wild-type

584 oviduct section showing multiple cilia on MCCs (arrows). (C) *Mci* mutant trachea

585 section showing cells with single cilium (white arrows). A primary cilium in a

586 neighboring cell is indicated (red arrow). (D) *Mci* mutant oviduct section showing cells

587 with single cilium (arrows). (E) Nuclear localized FOXJ1 expression in MCCs of wild-

588 type trachea. (F) Nuclear localized FOXJ1 expression in monociliated cells of *Mci*

589 mutant trachea. In all preparations, cilia were stained with anti-acetylated tubulin

590 antibodies (green) and nuclei with DAPI (blue). Wt, wild-type. Scale bars, 10 μm. For all

591 histological data presented in this and other figures, tissues from at least 2 wild-type

592 and 3 *Mci* mutant mice were analyzed, unless otherwise mentioned.

593

**Fig. 2**

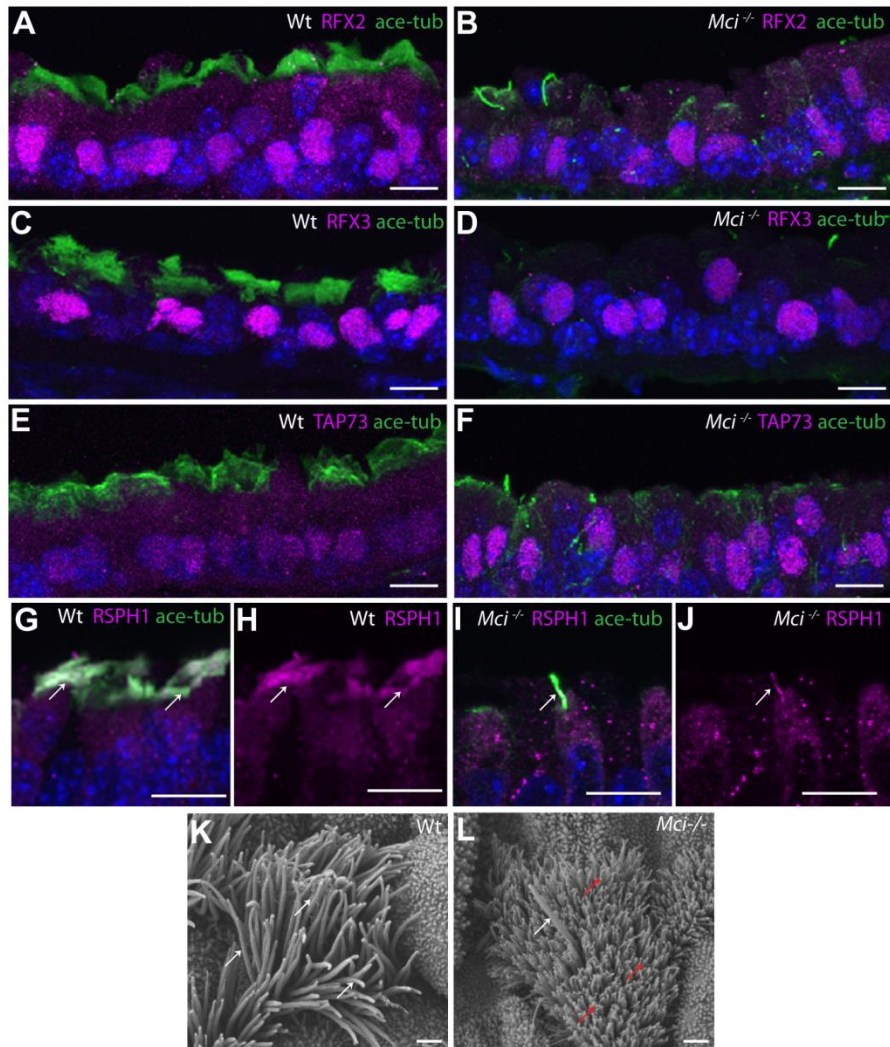

594

595 **Fig. 2. *Mci* mutant MCCs precursors express a suite of ciliary transcription factors and**

596 **their single cilium localizes motile cilia-specific proteins. (A) Nuclear localized RFX2**

597 **expression in MCCs of wild-type trachea. (B) Nuclear localized RFX2 expression in**

598 **monociliated cells of *Mci* mutant trachea. (C) Nuclear localized RFX3 expression in**

599 **MCCs of wild-type trachea. (D) Nuclear localized RFX3 expression in monociliated cells**

600 of *Mci* mutant trachea. (E) Nuclear localized TAP73 expression in MCCs of wild-type  
601 trachea. (F) Nuclear localized TAP73 expression in monociliated cells of *Mci* mutant  
602 trachea. (G) RSPH1 co-localization with acetylated tubulin to MCC cilia of wild-type  
603 trachea (arrows). (H) RSPH1 localization to MCC cilia of wild-type trachea (arrows;  
604 display of only RPSH1 staining from panel G). (I) RSPH1 co-localization with acetylated  
605 tubulin to single cilium of *Mci* mutant trachea (arrow). (J) RSPH1 localization to single  
606 cilium of *Mci* mutant trachea (arrow; display of only RSPH1 staining from panel I). (K)  
607 SEM analysis of a wild-type tracheal MCC showing multiple cilia (arrows). (L) SEM  
608 analysis of *Mci* mutant MCC with a single cilium (white arrow). The microvilli, which  
609 are quite long in the MCCs and normally remain obscured by the multiple cilia, are  
610 indicated (red arrows). One wild-type and one mutant trachea were scanned by SEM.  
611 The single cilium phenotype of the *Mci* mutant trachea is representative of several fields  
612 of view scanned by SEM. In all preparations, cilia were stained with anti-acetylated  
613 tubulin antibodies (green) and nuclei with DAPI (blue). Scale bars, A-J = 10  $\mu\text{m}$ ; K,L = 5  
614  $\mu\text{m}$ .

615

**Fig. 3**

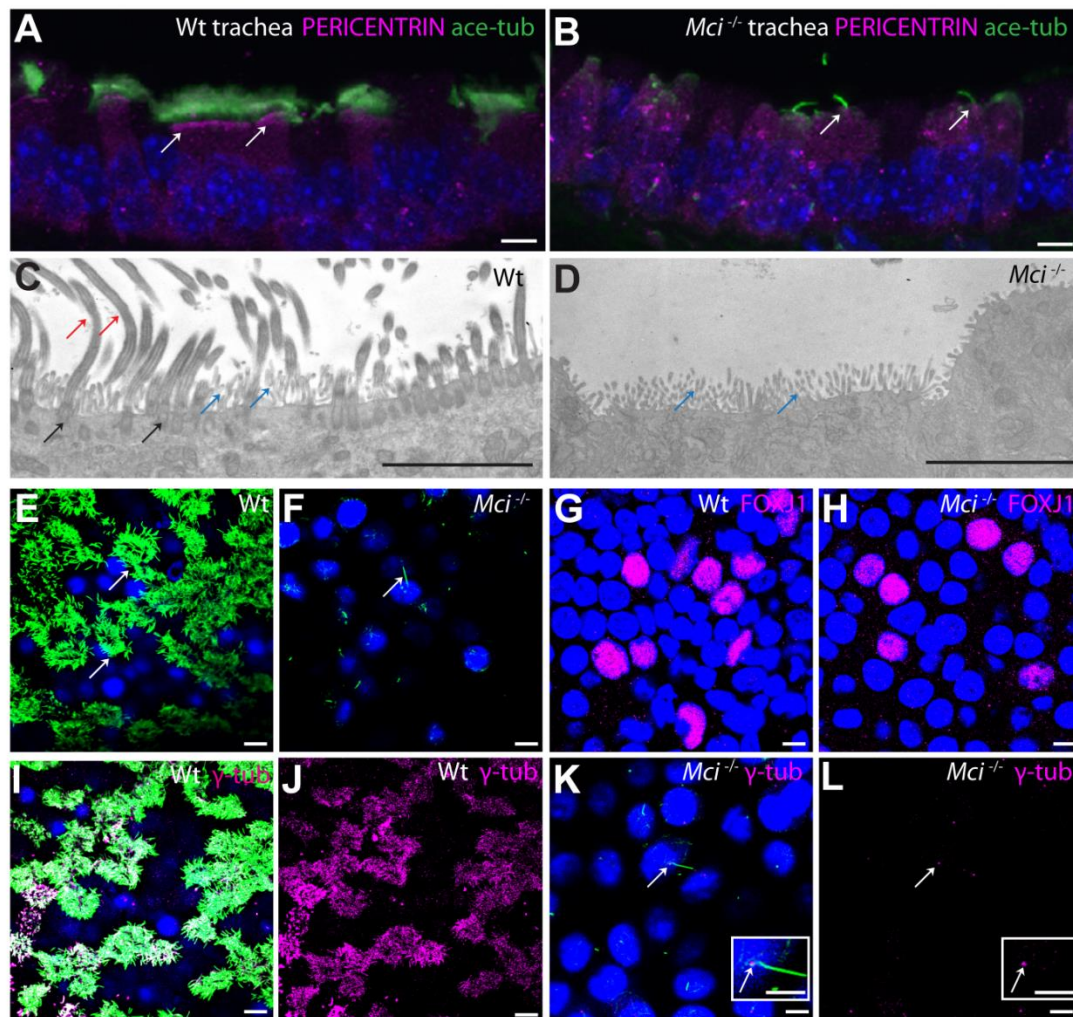

616

617 **Fig. 3. *Mci* mutant MCC precursors are unable to generate multiple basal bodies. (A)**

618 Wild-type trachea section showing apically aligned multiple basal bodies in MCCs

619 (arrows; stained with anti-PERICENTRIN antibodies). (B) Section of *Mci* mutant trachea

620 showing single basal body in monociliated cells (arrows). (C) TEM image showing

621 multiple basal bodies (black arrows) and cilia (red arrows) in a wild-type MCC.

622 Microvilli are also indicated (blue arrows). (D) TEM image showing lack of multiple

623 basal bodies and cilia in a *Mci* mutant MCC. Microvilli are indicated (blue arrows). 5

624 sections each from 2 independent wild-type and mutant tracheae were sampled. (E)  
625 Wild-type MCCs differentiated in ALI culture with multiple cilia (arrows). (F) *Mci*  
626 mutant airway cells differentiated in ALI culture with single cilium (arrow). (G) Wild-  
627 type airway cells differentiated in ALI culture showing nuclear FOXJ1 expression. (H)  
628 *Mci* mutant airway cells differentiated in ALI culture showing nuclear FOXJ1  
629 expression. (I) Wild-type MCCs differentiated in ALI culture with multiple basal bodies  
630 (stained with anti- $\gamma$ -tubulin antibodies) and multiple cilia. (J) Display of only  $\gamma$ -tubulin  
631 staining from panel I. (K) *Mci* mutant cells differentiated in ALI culture with single  
632 basal body (arrow) and single cilium. Inset shows single cilium and basal body (arrow).  
633 (L) Display of only  $\gamma$ -tubulin staining from panel K showing single basal body (arrow)  
634 Inset shows single basal body (arrow). In preparations shown in panels A,B,E,F,I,K cilia  
635 were stained with anti-acetylated tubulin antibodies (green) and nuclei were stained  
636 with DAPI (blue). Scale bars, 5 $\mu$ m. ALI cultures were done in 3 independent biological  
637 replicates.

638

**Fig. 4**

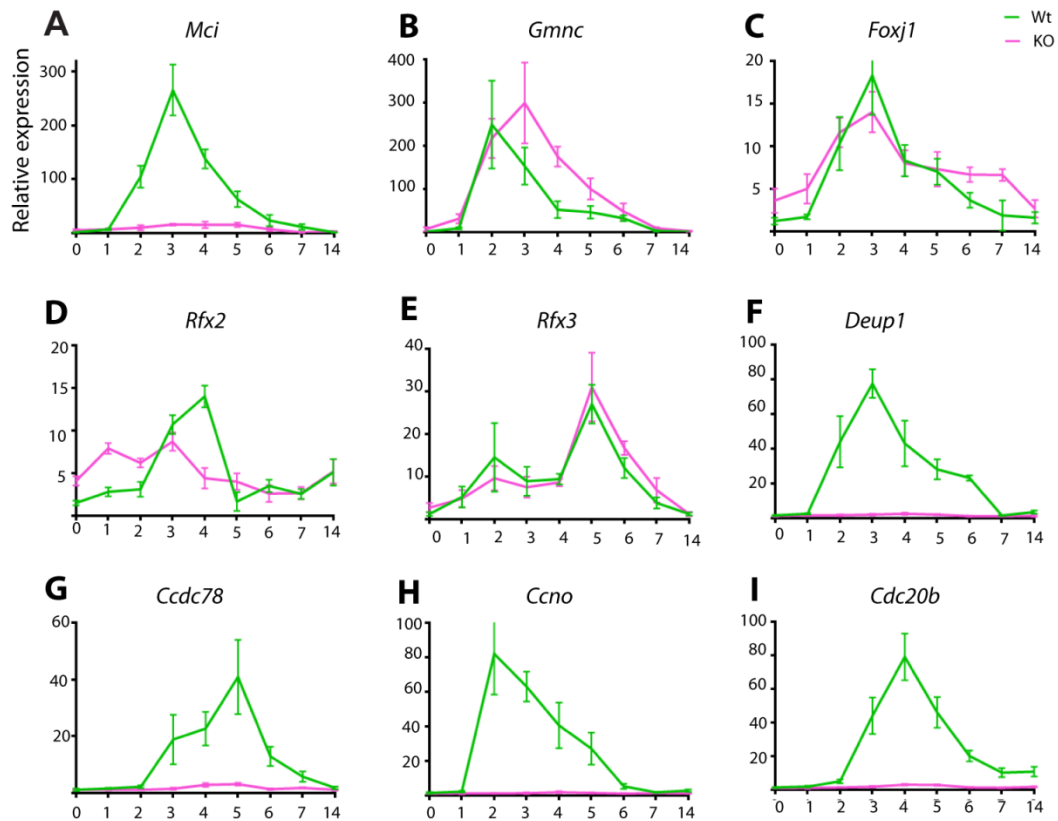

639

640 **Fig. 4. RT-qPCR analysis of ciliary transcription factor and DD pathway genes**

641 **expression levels between wild-type and *Mci* mutant airway cells in ALI culture. (A-**

642 **I) Relative expression levels have been plotted along the *y*-axis, and days in ALI culture**

643 **along the *x*-axis. KO = *Mci* mutant. Error bars: standard error of the mean (SEM).**

644 **Analysis was done on 3 independent biological replicates.**

645

**Fig. 5**

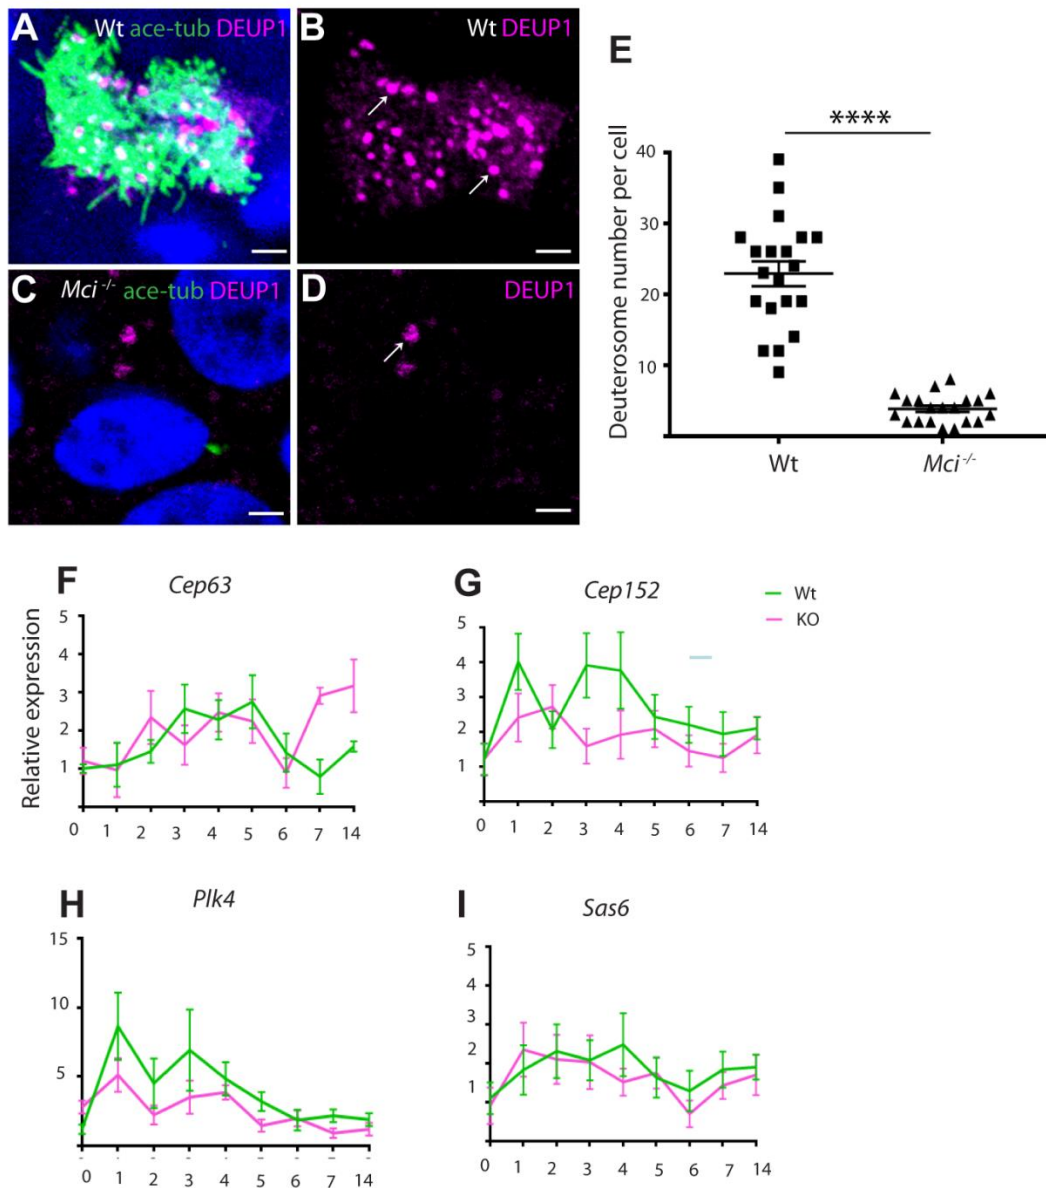

646

647 **Fig. 5. In *Mci* mutants, the DD pathway for basal body production is strongly**  
648 **affected but not the MCD pathway. (A)** ALI cultured wild-type MCCs showing  
649 DEUP1-positive deuterosomes. (B) Display of only DEUP1 staining from panel A,  
650 showing deuterosomes (arrows). (C) ALI cultured *Mci* mutant airway cells showing  
651 DEUP1-positive deuterosomes. (D) Display of only DEUP1 staining from panel C,

652 showing a deuterosome (arrow). Scale bars, 5  $\mu\text{m}$ . (E) Quantification of numbers of  
653 DEUP1<sup>+</sup> deuterosomes in differentiating wild-type and *Mci* mutant MCCs under ALI  
654 conditions. 20 cells were counted for each genotype at ALI day 3.  $p: **** \leq 0.0001$ . (F-I)  
655 RT-qPCR analysis of MCD pathway gene expression levels between wild-type and *Mci*  
656 mutant airway cells in ALI culture. Relative expression levels have been plotted along  
657 the  $y$ -axis, and days in ALI culture along the  $x$ -axis. Error bars: SEM. Analysis was done  
658 on 3 independent biological replicates.

659



**Fig. 6**

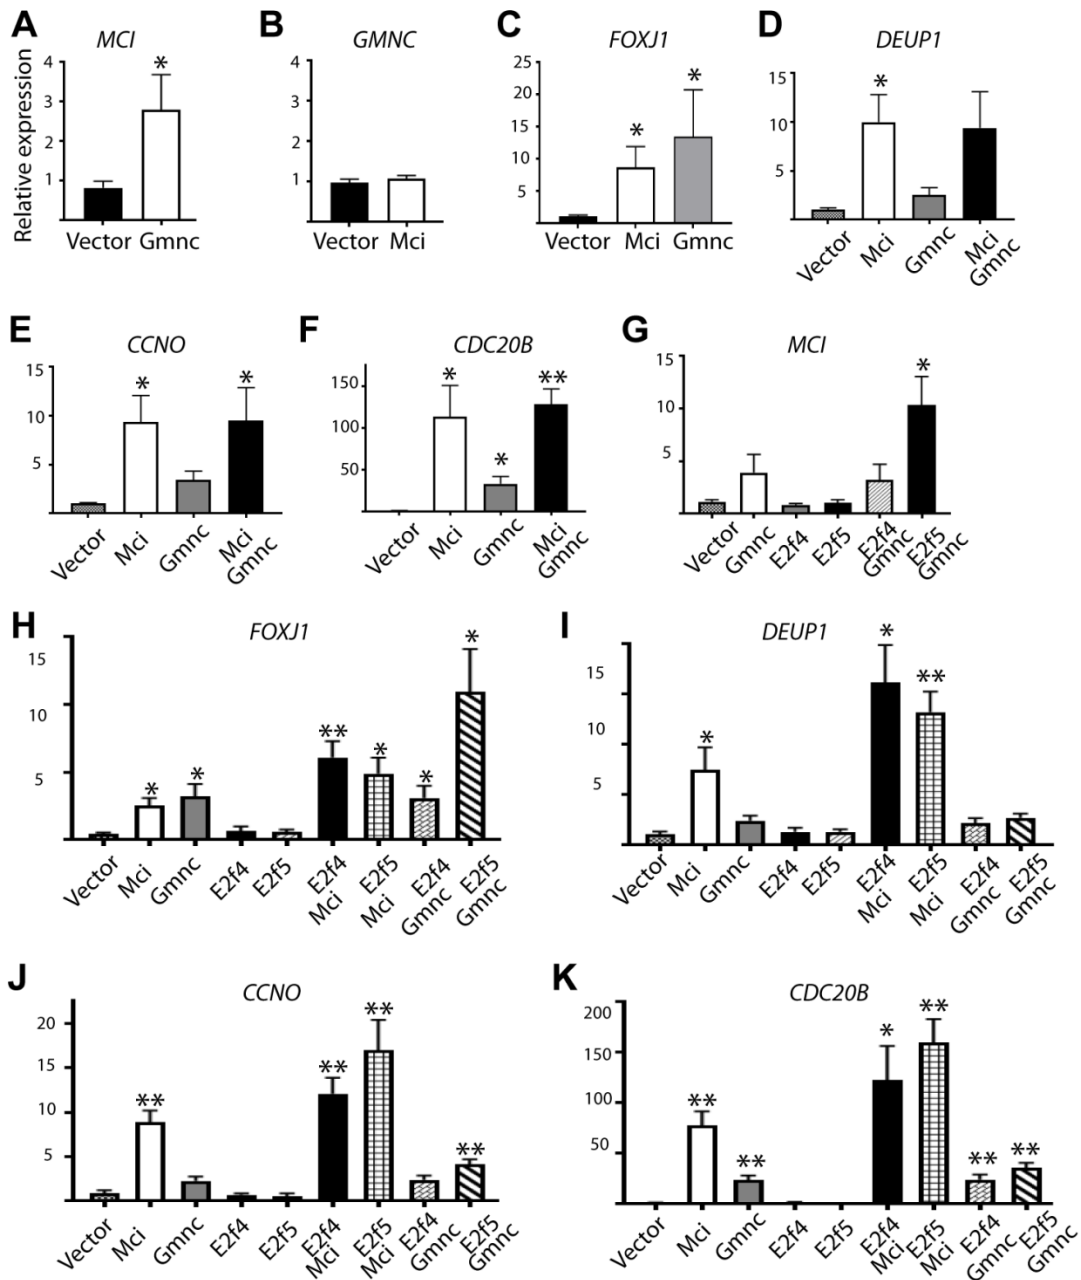

660

661 **Fig. 6. RT-qPCR analysis of ciliary transcription factor and DD pathway genes**  
 662 **expression levels on over-expression of MCI, GMNC and E2F proteins in HEK293T**  
 663 **cells. (A-K) Relative expression levels have been plotted along the y-axis, and over-**

664 expression conditions indicated along the *x*-axis. Error bars: SEM. Analysis was done on  
 665 3 independent biological replicates. p: \* ≤ 0.05, \*\* ≤ 0.01.

666

**Fig. 7**

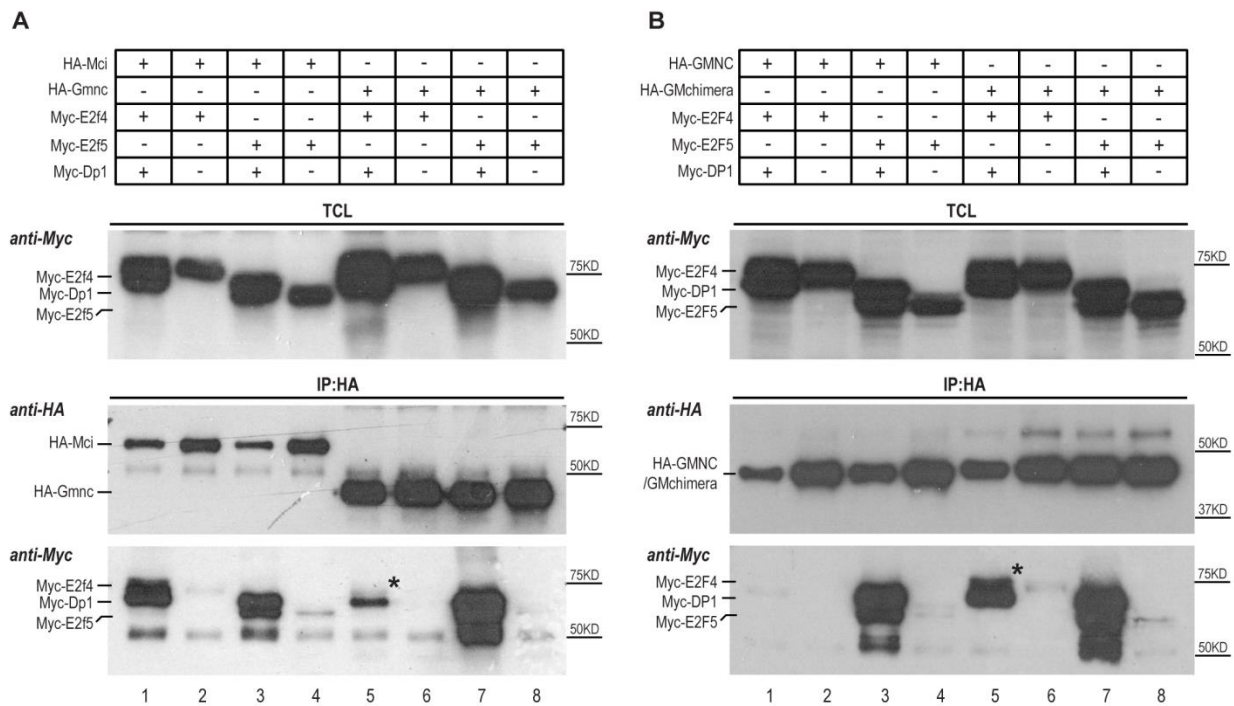

667

668 **Fig. 7. Differential interaction of MCI and GMNC with E2F4 and E2F5.** (A) While MCI

669 effectively interacted with both E2F4 and E2F5 in the presence of DP1 (lane 1, IP panel,

670 anti-Myc blot), very little E2F4 co-precipitated with GMNC and DP1 (lane 5, IP panel,

671 anti-Myc blot). The weak presence of E2F4 in the GMNC IP is marked by the black

672 asterisk. Mouse proteins were used for this experiment. (B) C-terminal domain of MCI

673 accounts for effective interaction with both E2F4 and E2F5. GMNC showed minimal

674 interaction with E2F4 (lane 1, IP panel, anti-Myc blot). In comparison, the GM

675 (engineered by replacing the C-terminus domain of GMNC with that of MCI) chimera  
676 could co-precipitate with both E2F4 and E2F5, in the presence of DP1 (lane 5 and 7, IP  
677 panel, anti-Myc blot). The black asterisk marks the E2F4 band that is absent in lane 1 (IP  
678 panel, anti-Myc blot). Human proteins were used for this experiment. The E2F and DP1  
679 proteins were tagged N-terminally with the Myc epitope and the GMNC and MCI  
680 proteins were tagged N-terminally with the HA epitope. TCL: Total cell lysate. IP:  
681 Immunoprecipitation. Data are representative of 2 independent biological replicates.

682

**Fig. 8**

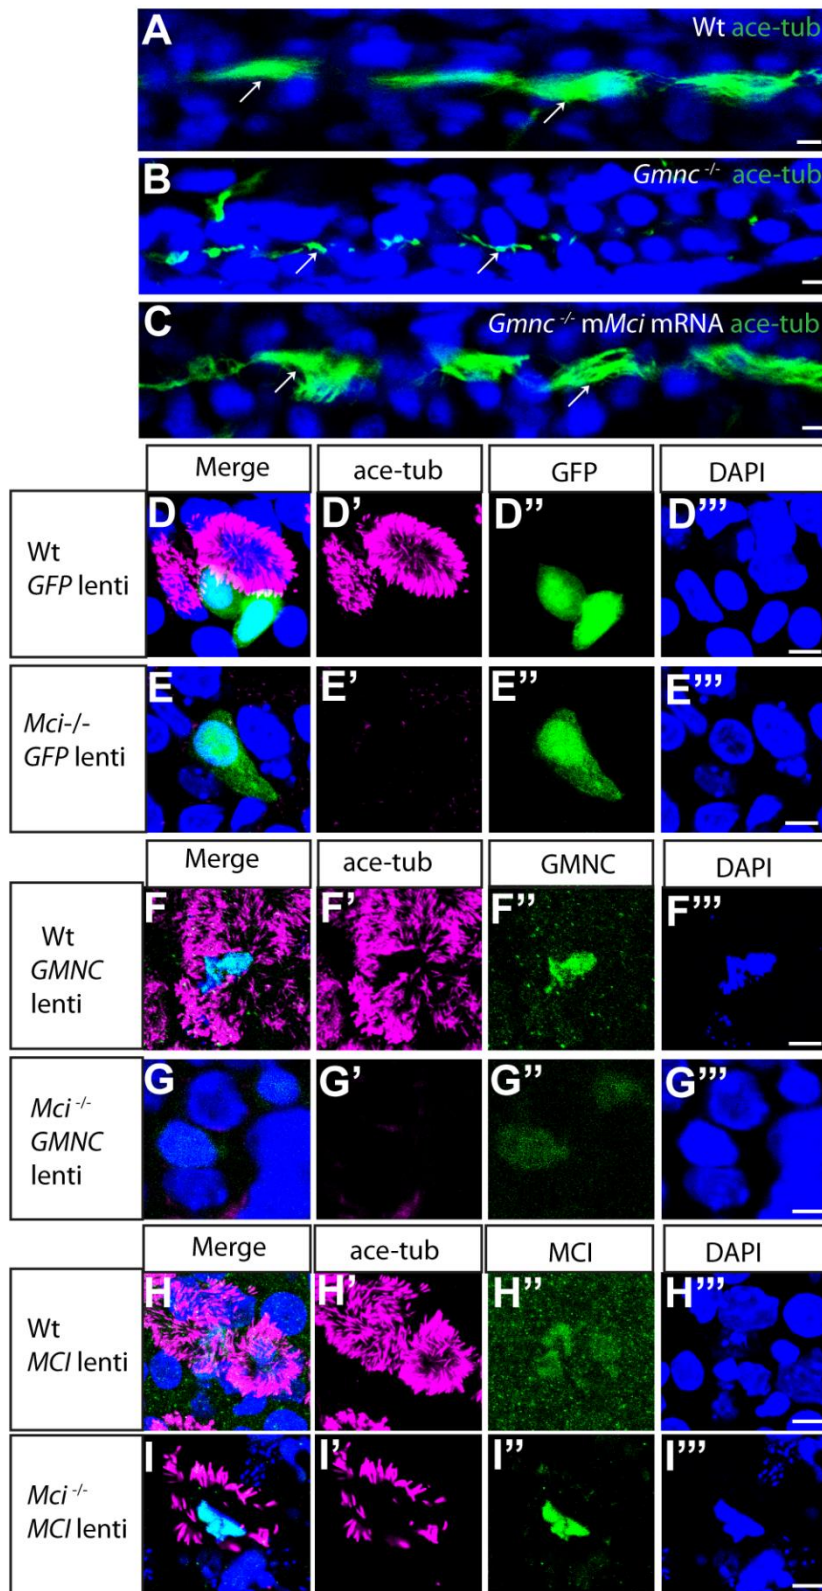

684 **Fig. 8. MCI can substitute for GMNC activity, but not *vice versa*, in MCC**  
685 **differentiation.** (A) Pronephric duct of a 48 hours post-fertilization (hpf) wild-type  
686 zebrafish embryo showing multiple cilia on MCCs (arrows). (B) Pronephric duct of a 48  
687 hpf *gmnc* mutant zebrafish embryo showing severe lack of MCCs. Monocilia, which are  
688 not affected by the loss of *Gmnc*, are indicated (arrows). (C) Pronephric duct of a 48 hpf  
689 *gmnc* mutant embryo showing rescue of MCCs (arrows) on over-expression of mouse  
690 *Mci* (*mMci*) mRNA. 16 zebrafish embryos over-expressing mouse MCI were genotyped.  
691 5 were *gmnc* homozygotes of which 3 showed MCC rescue in pronephric ducts (partial  
692 to full rescue in one or both ducts). (D) Lentivirus-mediated over-expression of GFP in  
693 wild-type airway cell ALI culture does not affect MCC differentiation (D'-D''' shows  
694 individual channels). (E) Over-expression of GFP in *Mci* mutant airway cell ALI culture  
695 does not restore MCC differentiation (E'-E''' shows individual channels). (F) Over-  
696 expression of GMNC in wild-type airway cell ALI culture induces supernumerary MCC  
697 differentiation (F'-F''' shows individual channels). (G) Over-expression of GMNC in  
698 *Mci* mutant airway cell ALI culture does not rescue MCC differentiation (G'-G''' shows  
699 individual channels). (H) Over-expression of MCI in wild-type airway cell ALI culture  
700 induces supernumerary MCC differentiation (H'-H''' shows individual channels). (I)  
701 Over-expression of MCI in *Mci* mutant airway cell ALI culture rescues MCC  
702 differentiation (I'-I''' shows individual channels). In all preparations, cilia were stained  
703 with anti-acetylated tubulin antibodies (green in a-c; magenta in d-i), and nuclei with

704 DAPI (blue). Over-expressed GFP, GMNC and MCI were detected with anti-GFP and  
705 anti-HA antibodies, respectively (green in D-I). Lentivirus-mediated over-expression of  
706 GFP, MCI and GMNC in ALI cultures represents 2 independent biological replicates.  
707 Scale bars, 5  $\mu$ m.

708 SUPPLEMENTAL INFORMATION

Fig. S1

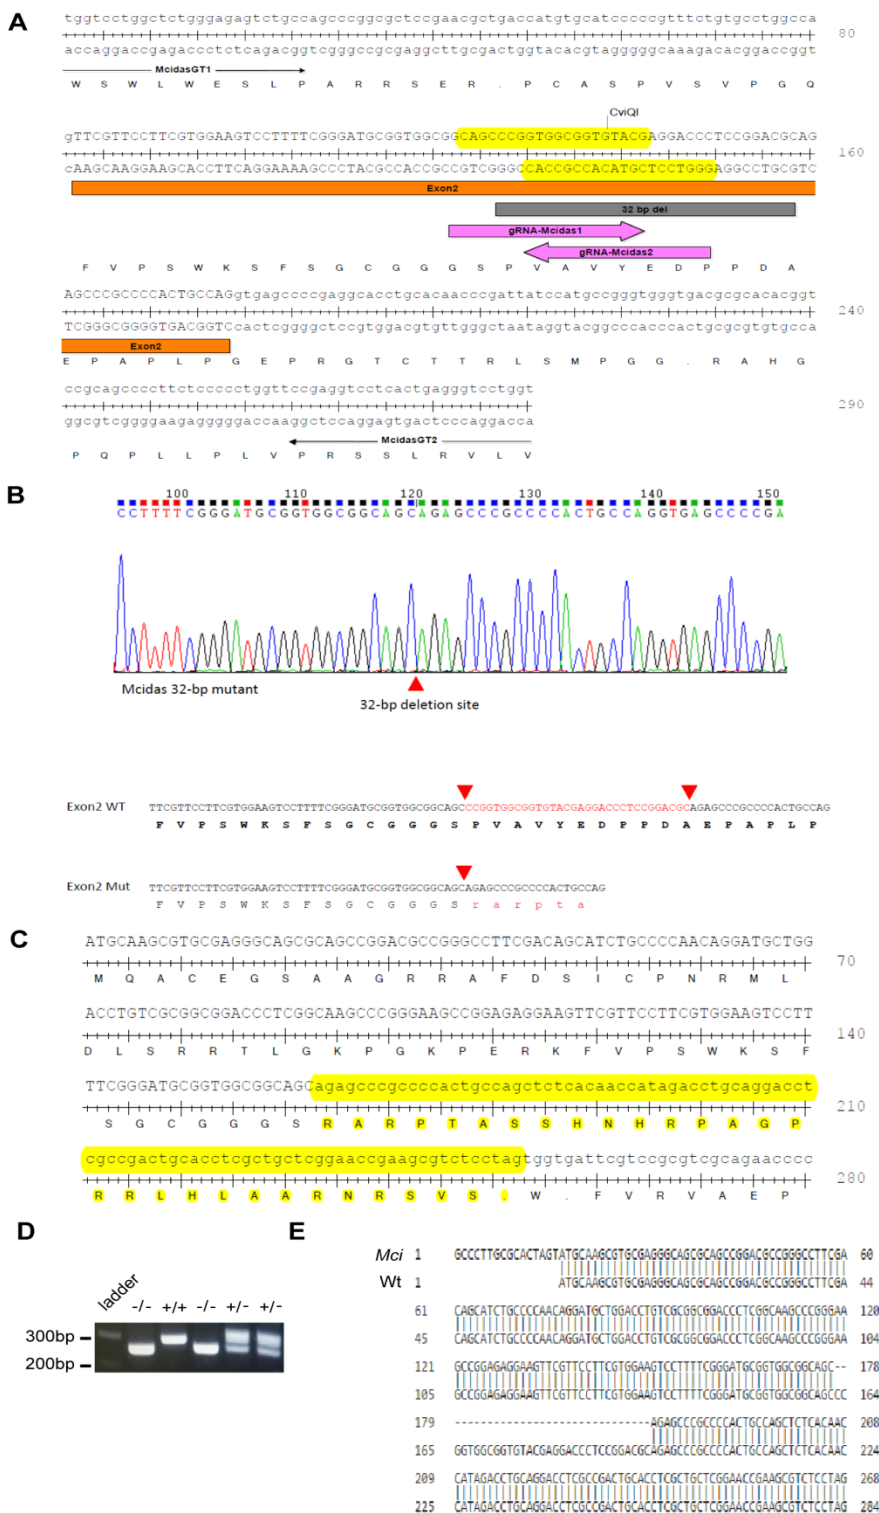

710 **Fig. S1. Generation of a deletion allele at the mouse *Mci* locus.** (A) Partial genomic  
711 sequence of the mouse *Mci* gene, showing the gRNAs (pink arrows) and their target  
712 sites on the forward and reverse strands (highlighted in yellow) used to induce a 32 bp  
713 deletion within exon 2. Binding sites for genotyping primers (McidasGT1 and  
714 McidasGT2) are also indicated. (B) Electropherogram showing 32 bp deletion in *Mci*  
715 exon 2. Also shown below is the conceptual translation of the wild-type and mutant *Mci*  
716 coding sequence around the deletion site. (C) Conceptual translation of the predicted  
717 mutant *Mci* ORF shows a highly truncated MCI protein, retaining only 54 native amino  
718 acids at the N-terminus. Sequences highlighted in yellow indicate disruption of the  
719 reading frame before the premature STOP codon. (D) Gel image of DNA fragments  
720 amplified in wild-type, heterozygote and homozygous *Mci* mutants using primers  
721 flanking the 32 bp deletion. Size of the wild-type band is 290 bp and the mutant band is  
722 258 bp. (E) Sequence analysis of *Mci* cDNA obtained from tracheal tissue of the  
723 homozygous mutants confirms a deletion of 32 bp.



**Fig. S2**

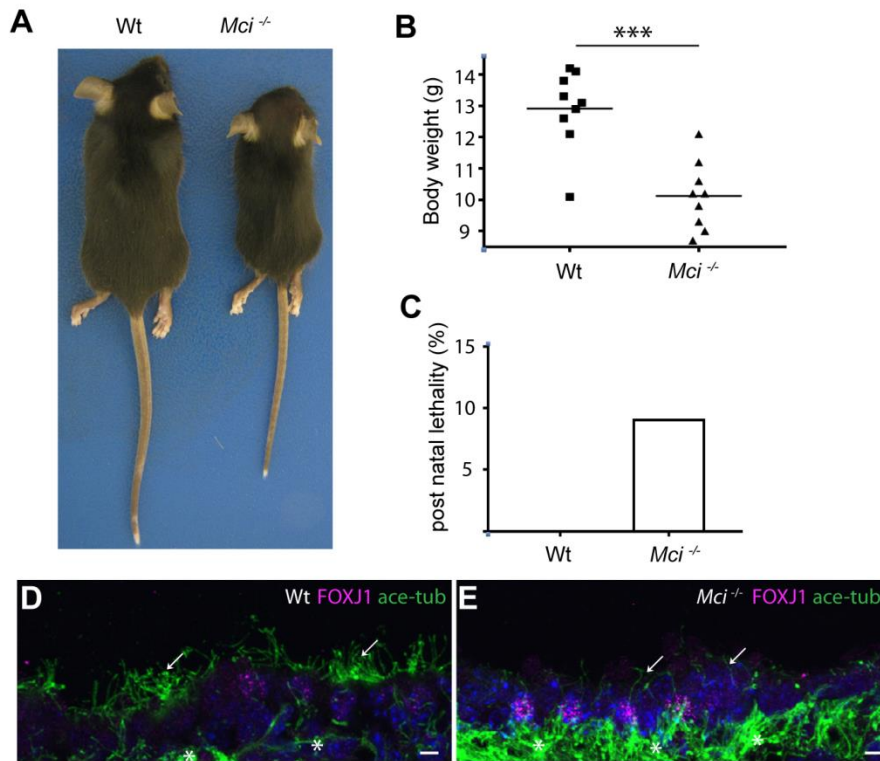

724

725

726 **Fig. S2. Gross phenotypes of *Mci* knockout mice.** (A) *Mci* knockout mice are smaller in

727 size compared to the wild-type. (B) The body weight comparison between wild-type

728 and *Mci* mutant mice at post-natal day (P) 28.  $n = 9$  for each genotype. (C) Percentage of

729 lethality of wild type and *Mci* knockout mice at P28.  $n = 22$  for each genotype. (D)

730 Nuclear localized FOXJ1 expression in MCCs of wild-type brain ependyma. Multicilia

731 are indicated by arrows and the cytoskeletal microtubule network by asterisks. (F)

732 Nuclear localized FOXJ1 expression in monociliated cells of *Mci* mutant brain

733 ependyma. Monocilia are indicated by arrows and the cytoskeletal microtubule

734 network by asterisks. Scale bars, 5  $\mu\text{m}$ .

**Fig. S3**

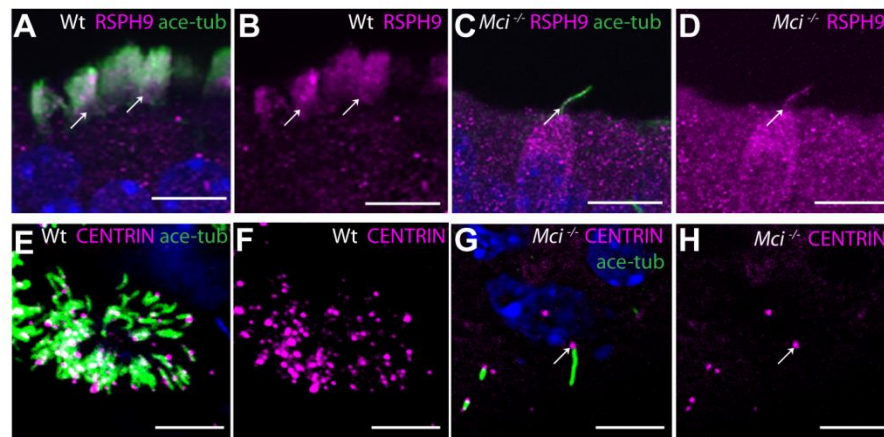

735

736 **Fig. S3. *Mci* mutant MCCs precursors differentiate a single cilium that localizes**  
737 **motile cilia-specific proteins but are unable to make multiple basal bodies. (A)**  
738 RSPH9 co-localization with acetylated tubulin to MCC cilia of wild-type trachea  
739 (arrows). (B) RSPH9 localization to MCC cilia of wild-type trachea (arrows; display of  
740 only RSPH9 staining from panel A). (C) RSPH9 co-localization with acetylated tubulin  
741 to single cilium of *Mci* mutant trachea (arrow). (D) RSPH9 localization to single cilium  
742 of *Mci* mutant trachea (arrow; display of only RSPH9 staining from panel C). (E) Wild-  
743 type MCC differentiated in ALI culture with multiple basal bodies (stained with anti-  
744 CENTRIN antibodies) and multiple cilia. (F) Display of only CENTRIN staining from  
745 panel E. (G) *Mci* mutant cells differentiated in ALI culture with single basal body  
746 (expressing CENTRIN, arrow) and single cilium. (H) Display of only CENTRIN staining  
747 from panel G showing single basal body (arrow). In all preparations, cilia were stained

748 with anti-acetylated tubulin antibodies (green) and nuclei with DAPI (blue). Scale bars

749 A-D = 10  $\mu\text{m}$ ; E-H = 5  $\mu\text{m}$ .

750

**Fig. S4**

**A**

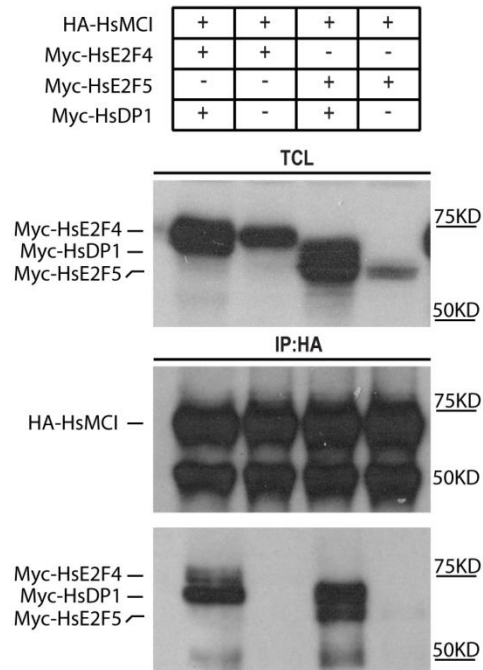

**C**

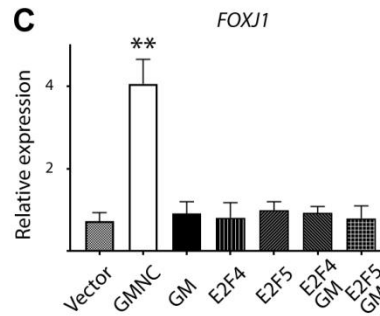

**D**

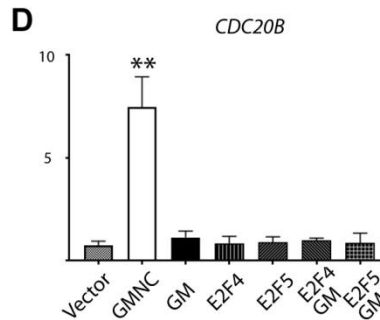

**B**

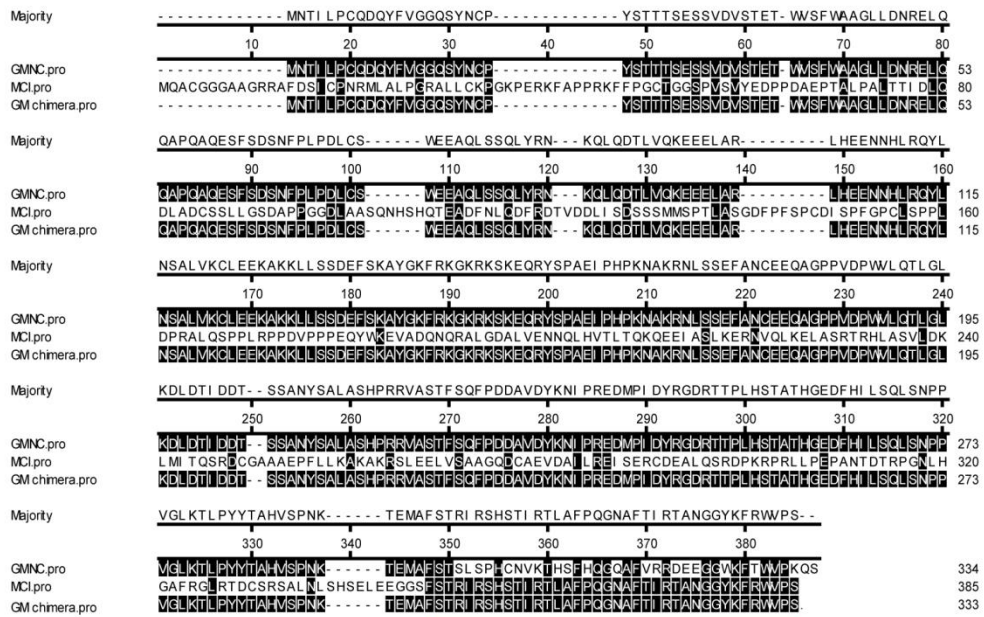

751

752 **Fig. S4. Interaction of MCI with E2F factors and transcriptional activity of the**

753 **GMNC-MCI chimeric protein in HEK293T cells. (A) Co-immunoprecipitation data**

754 showing interaction of MCI with E2F4 as well as E2f5. Human proteins were used for  
755 this experiment. (B) Amino acid sequence alignment of human GMNC, MCI and GM  
756 proteins. The C-terminal fragment from MCI used to generate GM is underlined in red.  
757 (C) Unlike wild-type GMNC, the GM chimeric protein is unable to induce *FOXJ1*  
758 expression by itself or together with the E2F factors. (D) The GM protein is not more  
759 efficient in inducing *CDC20B* expression than wild-type GMNC either by itself or with  
760 the E2F factors. For C and D, relative expression levels have been plotted along the *y*-  
761 axis, and over-expression conditions indicated along the *x*-axis. Error bars: SEM.  
762 Immunoblot and qPCR data are representative of 2 independent biological replicates. p:  
763 \*\*  $\leq 0.01$ .

**Fig. S5**

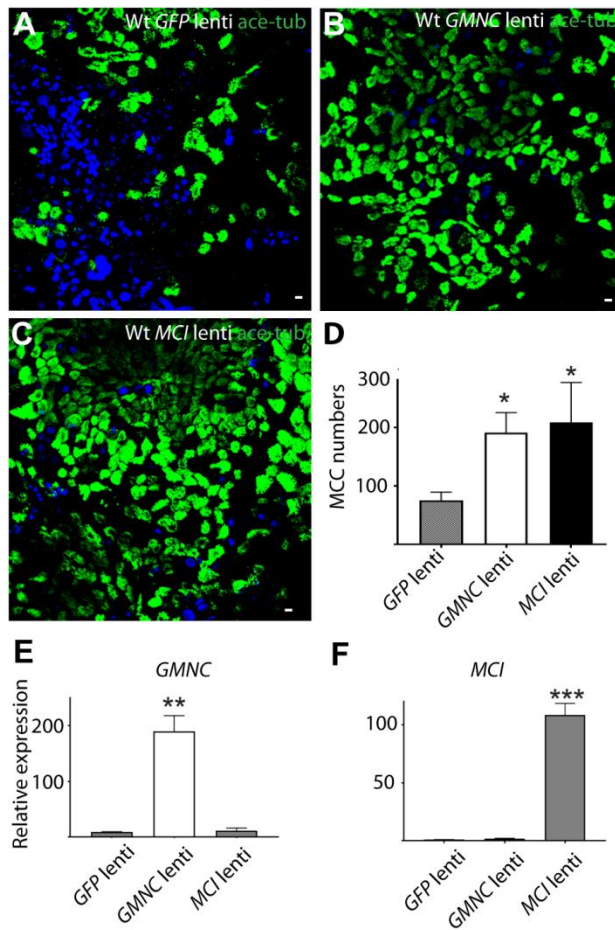

764

765 **Fig. S5. Over-expression of GMNC and MCI in wild-type airway cell ALI culture**  
766 **induces supernumerary MCCs.** (A) Lentivirus mediated over-expression of GFP in  
767 wild-type airway cell ALI culture does not affect numbers of differentiating MCCs. (B)  
768 Over-expression of GMNC in wild-type airway cell ALI culture induces supernumerary  
769 MCCs. (C) Over-expression of MCI in wild-type airway cell ALI culture induces  
770 supernumerary MCCs. Scale bars, 5  $\mu$ m. (D) Quantification of MCC numbers per field  
771 of view upon over-expression of GFP, GMNC and MCI in wild-type airway cell ALI  
772 cultures. (E,F) RT-qPCR analysis of GMNC and MCI expression levels on over-

773 expression of GMNC and MCI in *Mci* mutant airway cells cultured under ALI  
774 conditions. Relative expression levels have been plotted along the *y*-axis, and over-  
775 expression conditions indicated along the *x*-axis. Lentivirus-mediated over-expression  
776 of GFP, MCI and GMNC in ALI cultures represent 2 independent biological replicates;  
777 qPCR analysis represents 2 independent technical replicates. Error bars: SEM. p: \* ≤  
778 0.05, \*\* ≤ 0.01, \*\*\* ≤ 0.001.

779

**Fig. S6**

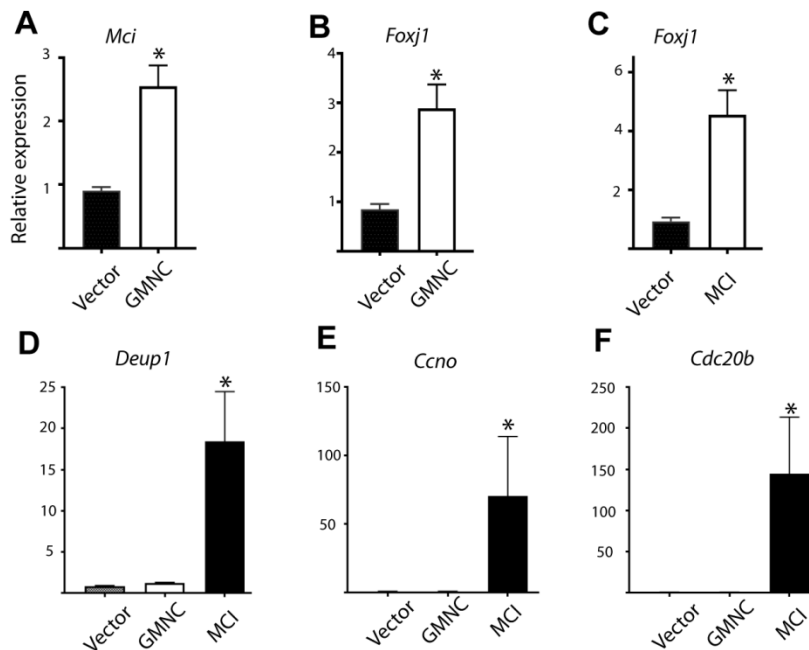

780

781 **Fig. S6. RT-qPCR analysis of ciliary transcription factor and DD pathway genes**  
782 **expression levels on over-expression of MCI and GMNC in *Mci* mutant airway cells**  
783 **cultured under ALI conditions. (A-F) Relative expression levels have been plotted**

784 along the *y*-axis, and over-expression conditions indicated along the *x*-axis. Error bars  
 785 represent SEM. Analysis was done on 3 independent biological replicates. *p*: \* ≤ 0.05.

786

787 **Table S1**

| Name of gRNA/primer | Sequence (5'-3')                                                                                                | Remarks                                          |
|---------------------|-----------------------------------------------------------------------------------------------------------------|--------------------------------------------------|
| gRNA-Mcidas1        | CAGCCCGGTGGCGGTGTACGGTTTTAGAGCTA<br>GAAATAGCAAGTTAAAATAAGGCTAGTCCGTT<br>ATCAACTTGAAAAAGTGGCACCGAGTCGGTGC<br>TTT | gRNA sequences                                   |
| gRNA-Mcidas2        | GGTCCTCGTACACCGCCACGTTTTAGAGCTA<br>GAAATAGCAAGTTAAAATAAGGCTAGTCCGTT<br>ATCAACTTGAAAAAGTGGCACCGAGTCGGTGC<br>TTT  |                                                  |
| McidasGT1(forward)  | TGGTCCTGGCTCTGGGAGAGTCTGCC                                                                                      | Primers for genotyping of <i>Mci</i> mutant mice |
| McidasGT2(reverse)  | ACCAGGACCCTCAGTGAGGACCTCGG                                                                                      |                                                  |
| Mci-L               | CGGAGCAGTACTGGAAGGAG                                                                                            | qPCR primers for mouse genes                     |
| Mci-R               | TTCGTTGTTGCCTTGATCTG                                                                                            |                                                  |
| Gmnc-L              | TCTGGAAGAGAAGGCCAAGA                                                                                            |                                                  |
| Gmnc-R              | CCCAGGTTGTTCCCTCACAGT                                                                                           |                                                  |
| Foxj1-L             | GAGCTGGAACCACTCAAAGG                                                                                            |                                                  |
| Foxj1-R             | GGTAGCAGGGCAGTTGATGT                                                                                            |                                                  |
| Rfx2-L              | TGTGAGCCGATCCTACAGTG                                                                                            |                                                  |
| Rfx2-R              | ACCTTGGTCTGGATGACCTG                                                                                            |                                                  |
| Rfx3-L              | CAGACAGTTCAGCAGGTCCA                                                                                            |                                                  |
| Rfx3-R              | CTGGGCAGAACTTCCTTGAG                                                                                            |                                                  |
| Deup1-L             | AGATGCGGGCTTTAGAGACA                                                                                            |                                                  |
| Deup1-R             | CGGTGAATTTGGTTTTGCTT                                                                                            |                                                  |
| Ccno-L              | GCTGAGCCTAACGGATTACG                                                                                            |                                                  |
| Ccno-R              | TGATGGACACTAGCGTCTGC                                                                                            |                                                  |
| Cdc20b-L            | GAAGGAAAATCTTGCCACCA                                                                                            |                                                  |
| Ccdc20b-R           | TTGGCATGTGGAATGGTAGA                                                                                            |                                                  |



|                       |                                                                             |                                                                                    |
|-----------------------|-----------------------------------------------------------------------------|------------------------------------------------------------------------------------|
| Ccdc78-L              | ACCAGGTGCCACCATTAGAG                                                        | qPCR primers<br>for human<br>genes                                                 |
| Ccdc78-R              | AAGCCAGTTGCTGACCAGTT                                                        |                                                                                    |
| Gapdh-L               | AACTTTGGCATTGTGGAAGG                                                        |                                                                                    |
| Gapdh-R               | ACACATTGGGGGTAGGAACA                                                        |                                                                                    |
| Cep63-L               | TCTGTGAGTGCAACATGCAA                                                        |                                                                                    |
| Cep63-R               | GAGGAACACTTGGCAGAAGC                                                        |                                                                                    |
| Plk4-L                | AAACCAAAAAGGCTGTGGTG                                                        |                                                                                    |
| Plk4-R                | GGAGGTCTGTCAGCAAGAGG                                                        |                                                                                    |
| Cep152-L              | GCTGTGGACACTGCTTTCAA                                                        |                                                                                    |
| Cep152-R              | CACCCTGCTGTTCTCCTCTC                                                        |                                                                                    |
| Sas6-L                | CCTGCAGCTTACAAACCAGG                                                        |                                                                                    |
| Sas6-R                | CTGGCTAATCCGCGTAAAG                                                         |                                                                                    |
| MCI-L                 | GCCTGAGCAATACTGGAAGG                                                        |                                                                                    |
| MCI-R                 | AGTTCCTTCAGCTGCACGTT                                                        |                                                                                    |
| GMNC-L                | CCCAAAAATGCCAAAAGAAA                                                        |                                                                                    |
| GMNC-R                | AATGTGCTGGCGACTCTTCT                                                        |                                                                                    |
| FOXJ1-L               | CACGTGAAGCCTCCCTACTC                                                        |                                                                                    |
| FOXJ1-R               | GGATTGAATTCTGCCAGGTG                                                        |                                                                                    |
| DEUP1-L               | CACAAAGAAAGCTGCCCTTC                                                        |                                                                                    |
| DEUP1-R               | TCGGAGCCTTTCATTCTCAT                                                        |                                                                                    |
| CCNO-L                | TCTACAGACCTTCCGCGACT                                                        |                                                                                    |
| CCNO-R                | TCCAGAGTGTTACCGTCAG                                                         |                                                                                    |
| CDC20B-L              | GAAGACACCGCCTGAGAAAG                                                        |                                                                                    |
| CDC20B-R              | CACAGAGCTGCATTTTCCA                                                         |                                                                                    |
| GAPDH-L               | GAGTCAACGGATTTGGTCGT                                                        |                                                                                    |
| GAPDH-R               | TTGATTTTGGAGGGATCTCG                                                        |                                                                                    |
| GM-N-N                | AGTCAGTCAAGCTTATGAAC<br>ACCATTCTGCCT                                        | Primers to<br>generate<br>GMNC N-<br>terminus and<br>MCI C-<br>terminus<br>chimera |
| GM-C-N                | GGATGCGGGTGCTGAATGCCAT<br>CTCTGTCTTG                                        |                                                                                    |
| GM-N-C                | CAAGACAGAGATGGCATTACAGC<br>ACCCGCATCC                                       |                                                                                    |
| GM-C-C                | AGTCAGTCGCGGCCGCACTGGGGA<br>CCCAGCGGAAC                                     |                                                                                    |
| GMNC-HA-<br>XhoI-pLvX | GATCGATCCTCGAGGCCACCATGT<br>ACCCATACGACGTGCCAGACTACG<br>CAATGAACACCATTCTGCC | Primers to<br>clone HA-<br>tagged GMNC<br>into PLVX<br>vector                      |
| GMNC-C-XbaI-<br>pLvX  | GATCGATCTCTAGACTAAGACTGC<br>TTAGGGAC                                        |                                                                                    |

|                              |                                                                             |                                                 |
|------------------------------|-----------------------------------------------------------------------------|-------------------------------------------------|
| MCI-HA-XhoI-pLv <sub>x</sub> | GATCGATCCTCGAGGCCACCATGT<br>ACCCATACGACGTGCCAGACTACG<br>CAATGCAGGCGTGCGGGGG | Primers to clone HA-tagged MCI into PLVX vector |
| MCI-C-XbaI-pLv <sub>x</sub>  | GATCGATCTCTAGATCAACTGGG<br>GACCCAGCG                                        |                                                 |

788

789

790 **REFERENCES**

- 791 AL JORD, A., LEMAITRE, A. I., DELGHEHYR, N., FAUCOURT, M., SPASSKY, N. &  
792 MEUNIER, A. 2014. Centriole amplification by mother and daughter centrioles  
793 differs in multiciliated cells. *Nature*, 516, 104-7.
- 794 ARBI, M., PEFANI, D.-E., KYROUSI, C., LALIOTI, M.-E., KALOGEROPOULOU, A.,  
795 PAPANASTASIOU, A. D., TARAVIRAS, S. & LYGEROU, Z. 2016. GemC1  
796 controls multiciliogenesis in the airway epithelium. *EMBO reports*, 17, 400-13.
- 797 BOON, M., WALLMEIER, J., MA, L., LOGES, N. T., JASPERS, M., OLBRICH, H.,  
798 DOUGHERTY, G. W., RAIDT, J., WERNER, C., AMIRAV, I., HEVRONI, A.,  
799 ABITBUL, R., AVITAL, A., SOFERMAN, R., WESSELS, M., O'CALLAGHAN, C.,  
800 CHUNG, E. M., RUTMAN, A., HIRST, R. A., MOYA, E., MITCHISON, H. M.,  
801 VAN DAELE, S., DE BOECK, K., JORISSEN, M., KINTNER, C., CUPPENS, H. &  
802 OMRAN, H. 2014. MCIDAS mutations result in a mucociliary clearance disorder  
803 with reduced generation of multiple motile cilia. *Nat Commun*, 5, 4418.
- 804 BROOKS, ERIC R. & WALLINGFORD, JOHN B. 2014. Multiciliated Cells. *Current*  
805 *Biology*, 24, R973-R982.
- 806 BUSTAMANTE-MARIN, X. M. & OSTROWSKI, L. E. 2017. Cilia and Mucociliary  
807 Clearance. *Cold Spring Harb Perspect Biol*, 9.

- 808 CHOKSI, S. P., BABU, D., LAU, D., YU, X. & ROY, S. 2014a. Systematic discovery of  
809 novel ciliary genes through functional genomics in the zebrafish. *Development*,  
810 141, 3410-9.
- 811 CHOKSI, S. P., LAUTER, G., SWOBODA, P. & ROY, S. 2014b. Switching on cilia:  
812 transcriptional networks regulating ciliogenesis. *Development*, 141, 1427-41.
- 813 FROMMER, A., HJEIJ, R., LOGES, N. T., EDELBUSCH, C., JAHNKE, C., RAIDT, J.,  
814 WERNER, C., WALLMEIER, J., GROSSE-ONNEBRINK, J., OLBRICH, H.,  
815 CINDRIC, S., JASPERS, M., BOON, M., MEMARI, Y., DURBIN, R., KOLB-  
816 KOKOCINSKI, A., SAUER, S., MARTHIN, J. K., NIELSEN, K. G., AMIRAV, I.,  
817 ELIAS, N., KEREM, E., SHOSEYOV, D., HAEFFNER, K. & OMRAN, H. 2015.  
818 Immunofluorescence Analysis and Diagnosis of Primary Ciliary Dyskinesia with  
819 Radial Spoke Defects. *Am J Respir Cell Mol Biol*, 53, 563-73.
- 820 FUNK, M. C., BERA, A. N., MENCHEN, T., KUALES, G., THRIENE, K., LIENKAMP, S.  
821 S., DENGJEL, J., OMRAN, H., FRANK, M. & ARNOLD, S. J. 2015. Cyclin O  
822 (Ccno) functions during deuterosome-mediated centriole amplification of  
823 multiciliated cells. *Embo j*, 34, 1078-89.
- 824 JACKSON, P. K. & ATTARDI, L. D. 2016. p73 and FoxJ1: Programming Multiciliated  
825 Epithelia. *Trends Cell Biol*, 26, 239-240.

- 826 KLOS DEHRING, D. A., VLADAR, E. K., WERNER, M. E., MITCHELL, J. W., HWANG,  
827 P. & MITCHELL, B. J. 2013. Deuterosome Mediated Centriole Biogenesis. *Dev*  
828 *Cell*, 27.
- 829 KNOWLES, M. R., ZARIWALA, M. & LEIGH, M. 2016. Primary Ciliary Dyskinesia. *Clin*  
830 *Chest Med*, 37, 449-61.
- 831 MA, L., QUIGLEY, I., OMRAN, H. & KINTNER, C. 2014. Multicilin drives centriole  
832 biogenesis via E2f proteins. *Genes & development*, 28, 1461-1471.
- 833 REVINSKI, D. R., ZARAGOSI, L.-E., BOUTIN, C., RUIZ-GARCIA, S., DEPREZ, M.,  
834 ROSNET, O., THOME, V., MERCEY, O., PAQUET, A., PONS, N., MARCET, B.,  
835 KODJABACHIAN, L. & BARBRY, P. 2017. CDC20B is required for deuterosome-  
836 mediated centriole production in multiciliated cells. *bioRxiv*.
- 837 SPASSKY, N. & MEUNIER, A. 2017. The development and functions of multiciliated  
838 epithelia. *Nature Publishing Group*, 18, 423-436.
- 839 STUBBS, J. L., OISHI, I., IZPISUA BELMONTE, J. C. & KINTNER, C. 2008. The forkhead  
840 protein Foxj1 specifies node-like cilia in *Xenopus* and zebrafish embryos. *Nat*  
841 *Genet*, 40, 1454-60.
- 842 STUBBS, J. L., VLADAR, E. K., AXELROD, J. D. & KINTNER, C. 2012. Multicilin  
843 promotes centriole assembly and ciliogenesis during multiciliate cell  
844 differentiation. *Nat Cell Biol*, 14, 140-7.

- 845 TERRÉ, B., PIERGIOVANNI, G., SEGURA-BAYONA, S., GIL-GÓMEZ, G., YOUSSEF, S.  
846 A., ATTOLINI, C. S.-O., WILSCH-BRÄUNINGER, M., JUNG, C., ROJAS, A. M.,  
847 MARJANOVIĆ, M., KNOBEL, P. A., PALENZUELA, L., LÓPEZ-ROVIRA, T.,  
848 FORROW, S., HUTTNER, W. B., VALVERDE, M. A., DE BRUIN, A.,  
849 COSTANZO, V. & STRACKER, T. H. 2016. GEMC1 is a critical regulator of  
850 multiciliated cell differentiation. *The EMBO journal*, 35, 942-60.
- 851 VLADAR, E. K. & BRODY, S. L. 2013. Analysis of ciliogenesis in primary culture mouse  
852 tracheal epithelial cells. *Methods Enzymol*, 525, 285-309.
- 853 YAGHI, A. & DOLOVICH, M. B. 2016. Airway Epithelial Cell Cilia and Obstructive  
854 Lung Disease. *Cells*, 5.
- 855 YU, X., NG, C. P., HABACHER, H. & ROY, S. 2008. Foxj1 transcription factors are  
856 master regulators of the motile ciliogenic program. *Nature Genetics*, 40, 1445.
- 857 ZHAO, H., CHEN, Q., HUANG, Q., YAN, X. & ZHU, X. 2018. Mother centrioles are  
858 dispensable for deuterosome formation and function during basal body  
859 amplification. *bioRxiv*.
- 860 ZHAO, H., ZHU, L., ZHU, Y., CAO, J., LI, S., HUANG, Q., XU, T., HUANG, X., YAN, X.  
861 & ZHU, X. 2013. The Cep63 paralogue Deup1 enables massive de novo centriole  
862 biogenesis for vertebrate multiciliogenesis. *Nat Cell Biol*, 15, 1434-44.

863 ZHOU, F., NARASIMHAN, V., SHBOUL, M., CHONG, Y. L., REVERSADE, B. & ROY,

864 S. 2015. Gmnc Is a Master Regulator of the Multiciliated Cell Differentiation

865 Program. *Current Biology*, 25, 3267-3273.

866 ZHOU, F. & ROY, S. 2015. SnapShot: Motile Cilia. *Cell*, 162, 224-224.e1.

867
